# Supplementary material for: How Does China's Local Fiscal Decentralization Promote Common Prosperity? An Analysis of the Mediating Role of Rural Revitalization
Source: Research Square preprint supplement (doi:10.21203/rs.3.rs-6733019/v1), 2025-05-30
Supplement: Supplementary file 1 [file 15a4fb12a9b4fc2095ca592b.xlsx]

## Sheet: Sheet1
Province	YEAR	CP	RR	FD	IS	SC	LM	LF	FDI	OPEN	FD1	CP1
Beijing	2010	0.498123	0.283577	0.92073	3.12859	0.449233	0.81841	7.30248	0.0305	1.46562	0.791082	0.495868
Beijing	2011	0.446983	0.288521	0.929074	3.29467	0.444391	0.811201	7.05531	0.028	1.64735	0.796093	0.437381
Beijing	2012	0.475404	0.295653	0.927779	3.36758	0.45435	0.806288	7.16058	0.0284	1.55926	0.794234	0.470487
Beijing	2013	0.483762	0.312823	0.929166	3.44334	0.448068	0.80252	7.04726	0.0267	1.47544	0.796462	0.480763
Beijing	2014	0.531097	0.314286	0.927063	3.65848	0.451835	0.80264	7.20769	0.026	1.31742	0.798347	0.532492
Beijing	2015	0.586036	0.32015	0.934218	4.03548	0.533222	0.768446	8.13103	0.0352	0.93706	0.811729	0.594888
Beijing	2016	0.538376	0.319705	0.936828	4.16526	0.511701	0.763074	7.87515	0.0337	0.758967	0.816646	0.534072
Beijing	2017	0.720954	0.312848	0.935842	4.23668	0.497367	0.771625	7.62601	0.0586	0.788146	0.810323	0.714931
Beijing	2018	0.789281	0.346963	0.936085	4.34759	0.47567	0.774318	7.50581	0.0378	0.905664	0.812769	0.77115
Beijing	2019	0.74632	0.315772	0.93143	5.16924	0.425874	0.790995	7.00957	0.0277	0.854036	0.807463	0.729129
Beijing	2020	0.898988	0.316228	0.92897	5.29682	0.379928	0.802017	7.54489	0.0269	0.680458	0.81037	0.841169
Beijing	2021	0.822551	0.320827	0.929913	4.52489	0.369204	0.821078	7.17103	0.0249	0.850153	0.807172	0.792392
Tianjin	2010	0.346083	0.177259	0.898853	0.875713	0.310067	0.798436	3.28186	0.0796	0.873644	0.721922	0.344311
Tianjin	2011	0.414416	0.18967	0.916274	0.880391	0.300257	0.778573	2.96372	0.0746	0.92625	0.740411	0.419034
Tianjin	2012	0.46654	0.199087	0.918473	0.909157	0.304128	0.762998	3.00069	0.0735	0.929473	0.755525	0.474637
Tianjin	2013	0.41488	0.208762	0.923517	0.948926	0.309542	0.743679	3.05874	0.0722	0.939182	0.770062	0.42457
Tianjin	2014	0.502041	0.215241	0.924875	1.00819	0.301312	0.728897	3.05216	0.0737	0.914602	0.781186	0.519375
Tianjin	2015	0.405863	0.221376	0.92404	1.11954	0.239639	0.702895	3.27388	0.0796	0.763545	0.787294	0.430929
Tianjin	2016	0.433516	0.227875	0.928702	1.33316	0.234163	0.677671	3.28878	0.0375	0.650146	0.78408	0.465193
Tianjin	2017	0.48835	0.240162	0.916087	1.42049	0.226986	0.736355	3.37176	0.0386	0.659235	0.738766	0.518631
Tianjin	2018	0.584451	0.244778	0.906026	1.44907	0.224949	0.767778	3.45929	0.0171	0.666655	0.714663	0.614576
Tianjin	2019	0.604389	0.252001	0.911577	1.80108	0.299072	0.747024	4.60367	0.0231	0.551518	0.733178	0.637617
Tianjin	2020	0.518953	0.261788	0.90141	1.88787	0.2544	0.775032	5.1836	0.0232	0.551708	0.702891	0.526609
Tianjin	2021	0.619371	0.268032	0.902476	1.64245	0.24019	0.799137	4.9033	0.0222	0.613969	0.706592	0.638602
Hebei	2010	0.136762	0.424409	0.766777	0.665295	0.334495	0.843351	2.05228	0.0127	0.169815	0.368807	0.148902
Hebei	2011	0.195985	0.437113	0.799842	0.646245	0.327768	0.834583	1.946	0.0123	0.182193	0.387107	0.209448
Hebei	2012	0.343682	0.442989	0.802725	0.670171	0.348222	0.823229	2.09125	0.0138	0.15926	0.409841	0.357855
Hebei	2013	0.350428	0.435436	0.801625	0.680045	0.369747	0.818234	2.24547	0.014	0.164529	0.41705	0.367538
Hebei	2014	0.300904	0.44951	0.795721	0.730097	0.401768	0.814458	2.44098	0.0133	0.172652	0.41625	0.321508
Hebei	2015	0.257933	0.460513	0.805928	0.832689	0.314281	0.786647	2.73555	0.0129	0.141843	0.418697	0.281505
Hebei	2016	0.243869	0.435003	0.806487	0.873092	0.317781	0.787543	2.9209	0.0152	0.119152	0.426435	0.269592
Hebei	2017	0.366554	0.446611	0.807771	0.949131	0.327446	0.783322	3.05049	0.0169	0.11827	0.42965	0.394385
Hebei	2018	0.323707	0.456478	0.817204	1.03692	0.332513	0.762231	3.15616	0.0167	0.120572	0.437632	0.355612
Hebei	2019	0.351955	0.462126	0.817532	1.32297	0.36991	0.762454	3.59876	0.0194	0.120618	0.442188	0.386809
Hebei	2020	0.448197	0.467849	0.829469	1.37746	0.3509	0.749463	3.90811	0.0207	0.130123	0.466565	0.481857
Hebei	2021	0.380363	0.481186	0.827227	1.22198	0.334475	0.780938	3.88654	0.018	0.150896	0.463561	0.418271
Shanxi	2010	0.341154	0.229881	0.819221	0.651964	0.36064	0.783088	3.06601	0.0053	0.102667	0.46127	0.348761
Shanxi	2011	0.159889	0.238915	0.844277	0.596943	0.347355	0.783022	2.85559	0.0119	0.0983664	0.472417	0.160476
Shanxi	2012	0.154397	0.249039	0.849254	0.695671	0.372069	0.763808	3.06756	0.013	0.0935928	0.508387	0.154695
Shanxi	2013	0.286244	0.259469	0.851299	0.74135	0.405778	0.74722	3.23664	0.0137	0.0957534	0.522285	0.293998
Shanxi	2014	0.1833	0.269365	0.842105	0.902252	0.448059	0.744906	3.38614	0.0142	0.0975577	0.524127	0.1897
Shanxi	2015	0.19152	0.277859	0.840455	1.30703	0.418682	0.71081	3.66622	0.014	0.0901588	0.482406	0.202606
Shanxi	2016	0.208331	0.274705	0.832149	1.43898	0.436707	0.71298	3.87727	0.0119	0.101377	0.460189	0.223595
Shanxi	2017	0.361297	0.272328	0.833848	1.18461	0.390156	0.740656	3.53832	0.0074	0.0862506	0.47863	0.376684
Shanxi	2018	0.346958	0.272992	0.84016	1.26789	0.387874	0.731553	3.57024	0.0093	0.0945711	0.518464	0.361915
Shanxi	2019	0.421147	0.277653	0.843978	1.17386	0.41291	0.722269	3.90568	0.0055	0.0899156	0.514561	0.439619
Shanxi	2020	0.308677	0.286092	0.854898	1.17646	0.382185	0.713446	4.14334	0.0066	0.0890159	0.528865	0.319271
Shanxi	2021	0.364402	0.296974	0.853882	0.899858	0.342948	0.776601	3.5869	0.0049	0.111106	0.557068	0.362183
Nei Mongol	2010	0.167926	0.229577	0.859582	0.686528	0.373164	0.722741	1.55913	0.0196	0.0773848	0.577331	0.164503
Nei Mongol	2011	0.367846	0.243473	0.879329	0.671402	0.364215	0.683952	1.51752	0.0173	0.0916922	0.590792	0.376864
Nei Mongol	2012	0.224267	0.255594	0.883007	0.715024	0.374469	0.672783	1.56776	0.0166	0.0781647	0.603926	0.227288
Nei Mongol	2013	0.271669	0.260297	0.888298	0.734895	0.388833	0.676405	1.66405	0.0177	0.0765301	0.614223	0.279176
Nei Mongol	2014	0.265817	0.268919	0.876691	0.831178	0.414195	0.680875	1.75376	0.0144	0.0870252	0.616378	0.275773
Nei Mongol	2015	0.244887	0.278198	0.848368	1.01542	0.291772	0.671561	1.97506	0.0118	0.0714651	0.616537	0.252317
Nei Mongol	2016	0.308897	0.280531	0.843134	1.33239	0.38644	0.672738	2.23557	0.0109	0.0613599	0.61429	0.318372
Nei Mongol	2017	0.301718	0.294116	0.841432	1.33776	0.371495	0.695939	2.75896	0.0132	0.0676891	0.547144	0.306658
Nei Mongol	2018	0.398585	0.314077	0.842396	1.32238	0.359972	0.700668	2.62282	0.0121	0.0706591	0.557793	0.404817
Nei Mongol	2019	0.363278	0.332304	0.843602	1.38497	0.388229	0.703651	2.71489	0.0083	0.067312	0.573847	0.365577
Nei Mongol	2020	0.446974	0.342536	0.850445	1.42853	0.356795	0.694625	2.77763	0.0072	0.0641156	0.592903	0.450307
Nei Mongol	2021	0.429756	0.356689	0.848539	1.31005	0.354695	0.744588	2.56716	0.001	0.0678188	0.601929	0.42262
Liaoning	2010	0.269293	0.238685	0.845128	0.690392	0.404369	0.770024	2.49562	0.0761	0.422185	0.591038	0.275252
Liaoning	2011	0.238988	0.245845	0.868437	0.655782	0.389808	0.761182	2.4144	0.0705	0.426823	0.613388	0.243041
Liaoning	2012	0.213925	0.2521	0.869018	0.650856	0.399767	0.744597	2.47963	0.0681	0.423904	0.632007	0.217427
Liaoning	2013	0.213693	0.25602	0.872952	0.672752	0.415931	0.729425	2.54068	0.0661	0.433197	0.635023	0.22075
Liaoning	2014	0.243863	0.264323	0.870546	0.685168	0.440546	0.746302	2.62262	0.0588	0.413784	0.609927	0.256906
Liaoning	2015	0.416501	0.2839	0.869582	0.779527	0.253977	0.778251	2.93142	0.0113	0.345082	0.494782	0.442078
Liaoning	2016	0.34725	0.273489	0.87651	0.895557	0.258033	0.775532	4.0625	0.009	0.308528	0.494555	0.386104
Liaoning	2017	0.43254	0.274631	0.873683	0.978874	0.267142	0.775069	4.08077	0.0154	0.333719	0.489202	0.471683
Liaoning	2018	0.393843	0.285052	0.867642	1.17036	0.270243	0.772964	4.10822	0.0128	0.354315	0.500662	0.432114
Liaoning	2019	0.427978	0.304587	0.865812	1.52478	0.359254	0.768859	4.50753	0.0092	0.308003	0.494731	0.468166
Liaoning	2020	0.325554	0.311373	0.873761	1.48677	0.310609	0.759543	4.7859	0.0069	0.27559	0.515671	0.351268
Liaoning	2021	0.413789	0.32226	0.862493	1.44987	0.318585	0.786862	4.46382	0.0075	0.314794	0.502445	0.455094
Jilin	2010	0.313759	0.208927	0.831347	0.742027	0.389561	0.7212	1.93972	0.01	0.191006	0.40905	0.329904
Jilin	2011	0.338065	0.223369	0.857867	0.718734	0.377531	0.715339	1.79777	0.0091	0.207324	0.450551	0.35517
Jilin	2012	0.173307	0.230626	0.860509	0.917633	0.401049	0.715234	1.83108	0.0087	0.205743	0.482886	0.193315
Jilin	2013	0.197171	0.234259	0.859905	1.00502	0.432462	0.708863	1.95287	0.0086	0.19916	0.4962	0.219486
Jilin	2014	0.300974	0.24073	0.853047	1.24154	0.466461	0.707696	2.10006	0.0087	0.192401	0.492931	0.32364
Jilin	2015	0.308416	0.250045	0.860532	1.59482	0.296413	0.678868	2.39653	0.0094	0.136969	0.484413	0.333043
Jilin	2016	0.328716	0.260602	0.861153	1.88946	0.311586	0.656077	2.58141	0.0102	0.128638	0.486449	0.355581
Jilin	2017	0.270978	0.299815	0.864919	2.18609	0.319279	0.658879	2.6446	0.0098	0.123407	0.452763	0.298974
Jilin	2018	0.245988	0.31845	0.857956	2.31453	0.322401	0.663261	2.71207	0.0103	0.133566	0.45102	0.278545
Jilin	2019	0.37246	0.348554	0.860775	1.8851	0.411667	0.664579	3.84061	0.0149	0.117176	0.418737	0.407806
Jilin	2020	0.385598	0.363263	0.873656	1.94537	0.371741	0.663253	4.0499	0.0151	0.109876	0.435521	0.413592
Jilin	2021	0.374383	0.37362	0.868136	1.87178	0.372526	0.720688	4.09551	0.0149	0.127742	0.426522	0.408941
Heilongjiang	2010	0.279206	0.299593	0.923247	1.3623	0.360398	0.728793	1.93529	0.018	0.22323	0.383496	0.295823
Heilongjiang	2011	0.346112	0.316616	0.931391	1.40553	0.374344	0.718764	1.81824	0.0177	0.281846	0.40944	0.365907
Heilongjiang	2012	0.336004	0.335537	0.92665	1.55309	0.388491	0.712094	1.91602	0.0184	0.24804	0.430444	0.355918
Heilongjiang	2013	0.312149	0.354611	0.925123	1.67482	0.392196	0.715659	2.04022	0.0199	0.238503	0.44178	0.335019
Heilongjiang	2014	0.404068	0.36243	0.924076	1.87026	0.394756	0.717831	2.17073	0.0211	0.232329	0.434956	0.428476
Heilongjiang	2015	0.400339	0.368661	0.931702	2.13023	0.461946	0.65606	2.48174	0.0229	0.130652	0.3975	0.428204
Heilongjiang	2016	0.368362	0.380126	0.934424	2.33907	0.446727	0.644612	2.59351	0.0255	0.101068	0.389516	0.400293
Heilongjiang	2017	0.330205	0.385103	0.934864	2.27117	0.447214	0.623075	2.69285	0.0249	0.111876	0.386997	0.366338
Heilongjiang	2018	0.321764	0.391621	0.93548	2.34707	0.455167	0.635951	2.77957	0.0241	0.149588	0.388009	0.363445
Heilongjiang	2019	0.42626	0.399426	0.929768	2.69462	0.415345	0.62999	3.60595	0.0028	0.145483	0.37985	0.468886
Heilongjiang	2020	0.263223	0.408429	0.929087	2.75112	0.411686	0.60029	3.95638	0.0027	0.118527	0.382751	0.302619
Heilongjiang	2021	0.330771	0.412412	0.931736	2.76572	0.418358	0.656916	3.94708	0.0026	0.150709	0.391243	0.385686
Shanghai	2010	0.401668	0.197148	0.83966	0.787511	0.328452	0.81564	5.02996	0.0439	1.49694	0.797506	0.408665
Shanghai	2011	0.532429	0.187568	0.863677	0.826964	0.326984	0.804351	4.8648	0.0424	1.58946	0.792814	0.55112
Shanghai	2012	0.564869	0.194426	0.862432	0.86712	0.340579	0.803619	5.17982	0.0475	1.4895	0.790614	0.587234
Shanghai	2013	0.584088	0.198765	0.864092	0.908146	0.349406	0.804836	5.20733	0.0476	1.38229	0.792221	0.611669
Shanghai	2014	0.455799	0.207188	0.861871	0.991735	0.360404	0.805165	5.16802	0.0473	1.34159	0.798675	0.47273
Shanghai	2015	0.592084	0.212649	0.863193	1.06371	0.380939	0.769719	6.25503	0.0458	1.21451	0.817662	0.622389
Shanghai	2016	0.712342	0.219213	0.858182	1.11762	0.382648	0.768497	6.05044	0.0436	1.05497	0.833226	0.746168
Shanghai	2017	0.768342	0.229409	0.855347	1.1168	0.382186	0.770763	5.86439	0.0375	1.05129	0.822971	0.795886
Shanghai	2018	0.730177	0.243414	0.855713	1.14441	0.383092	0.768089	5.94815	0.035	1.04087	0.825274	0.743951
Shanghai	2019	0.663678	0.252879	0.856358	1.15347	0.378118	0.784686	5.57362	0.0344	0.945071	0.820136	0.668753
Shanghai	2020	0.875634	0.241649	0.866556	1.21999	0.361044	0.792058	6.21459	0.0361	0.939923	0.828512	0.877806
Shanghai	2021	0.840134	0.252894	0.873596	1.15627	0.366974	0.804908	6.29096	0.0337	1.05718	0.828216	0.837694
Jiangsu	2010	0.270081	0.371783	0.831628	0.843746	0.37468	0.881257	2.44065	0.0466	0.818144	0.620666	0.258732
Jiangsu	2011	0.409593	0.381874	0.849308	0.856523	0.387787	0.872608	2.313	0.0423	0.803065	0.627825	0.404613
Jiangsu	2012	0.271143	0.382523	0.841342	0.905569	0.40962	0.869136	2.40285	0.0418	0.741691	0.635884	0.255446
Jiangsu	2013	0.401563	0.387453	0.845255	0.939857	0.422994	0.868601	2.46749	0.0345	0.674593	0.645531	0.39219
Jiangsu	2014	0.337006	0.39753	0.842329	1.00238	0.443962	0.869314	2.50903	0.0266	0.631856	0.650863	0.317321
Jiangsu	2015	0.388798	0.411243	0.857422	1.0827	0.440948	0.864045	2.66328	0.0216	0.556525	0.658495	0.366034
Jiangsu	2016	0.377498	0.425317	0.85371	1.13668	0.442668	0.870952	2.7422	0.0211	0.478595	0.650884	0.349972
Jiangsu	2017	0.54326	0.437648	0.851262	1.24155	0.44663	0.876312	2.70242	0.0198	0.500088	0.626081	0.516989
Jiangsu	2018	0.552085	0.447043	0.855304	1.30709	0.447743	0.874931	2.75864	0.0183	0.517754	0.626928	0.517467
Jiangsu	2019	0.59991	0.455343	0.863618	1.26805	0.438541	0.872553	2.87226	0.0181	0.463812	0.621358	0.566521
Jiangsu	2020	0.490771	0.456977	0.862478	1.36415	0.412141	0.866921	3.18445	0.0191	0.454501	0.645784	0.441686
Jiangsu	2021	0.631065	0.462436	0.871592	1.28631	0.397336	0.874659	3.236	0.016	0.503769	0.645195	0.590679
Zhejiang	2010	0.286023	0.315003	0.784619	0.651535	0.347957	0.882924	3.65846	0.0269	0.672591	0.601825	0.300948
Zhejiang	2011	0.420976	0.32121	0.818791	0.598835	0.34562	0.879372	3.53145	0.0233	0.705955	0.597891	0.440074
Zhejiang	2012	0.309928	0.325937	0.827573	0.598466	0.356891	0.878953	3.64018	0.0238	0.660449	0.59426	0.327809
Zhejiang	2013	0.475209	0.328379	0.829103	0.604272	0.366352	0.873295	3.68336	0.0232	0.653758	0.59855	0.499651
Zhejiang	2014	0.507035	0.337833	0.825879	0.666086	0.381653	0.871086	3.74886	0.0242	0.644799	0.598979	0.537852
Zhejiang	2015	0.453582	0.3513	0.825178	0.785809	0.508543	0.847246	3.88859	0.0246	0.579369	0.616111	0.487055
Zhejiang	2016	0.418696	0.358433	0.823047	0.84746	0.518793	0.852409	3.83766	0.0247	0.517735	0.626868	0.448927
Zhejiang	2017	0.432129	0.363885	0.827676	0.903349	0.530343	0.8563	3.81612	0.0233	0.524193	0.618849	0.457372
Zhejiang	2018	0.542942	0.370257	0.822938	0.977217	0.538418	0.851222	3.9555	0.0219	0.541825	0.63368	0.577111
Zhejiang	2019	0.569203	0.379945	0.829719	1.22966	0.481277	0.839054	4.05843	0.015	0.520442	0.635793	0.610427
Zhejiang	2020	0.506353	0.385336	0.831247	1.26497	0.473984	0.844147	4.57871	0.0169	0.548952	0.656567	0.53045
Zhejiang	2021	0.638704	0.390404	0.833464	1.24823	0.499804	0.850174	4.57958	0.0163	0.633713	0.661143	0.684797
Anhui	2010	0.32845	0.323532	0.793781	0.777715	0.360315	0.804706	2.28282	0.0275	0.133163	0.378483	0.341974
Anhui	2011	0.128628	0.301969	0.825963	0.758473	0.357411	0.797175	2.20211	0.028	0.139749	0.391792	0.142019
Anhui	2012	0.284429	0.312127	0.831005	0.75944	0.368317	0.784043	2.32434	0.0317	0.155684	0.420494	0.298172
Anhui	2013	0.160498	0.334183	0.840653	0.751905	0.378412	0.788686	2.42475	0.0344	0.160741	0.440428	0.172925
Anhui	2014	0.377659	0.337942	0.836384	0.761113	0.388542	0.792888	2.53461	0.0364	0.158732	0.441191	0.392889
Anhui	2015	0.246286	0.344368	0.844709	0.82641	0.472405	0.780162	2.77068	0.0385	0.145932	0.44915	0.262713
Anhui	2016	0.282984	0.348879	0.843968	0.876568	0.475624	0.790063	2.95395	0.0402	0.122712	0.460157	0.303188
Anhui	2017	0.239303	0.343704	0.843838	0.951699	0.478337	0.79095	3.00943	0.0397	0.132319	0.444873	0.255406
Anhui	2018	0.286787	0.350583	0.834978	0.939619	0.47979	0.806763	3.02104	0.0375	0.134302	0.45211	0.299407
Anhui	2019	0.289585	0.362859	0.831335	0.933693	0.445732	0.799373	2.65849	0.0333	0.13559	0.452015	0.306841
Anhui	2020	0.318976	0.362047	0.83453	1.02528	0.424256	0.803644	2.88047	0.0327	0.150305	0.47334	0.332467
Anhui	2021	0.386151	0.366934	0.833607	1.00787	0.417393	0.823296	2.92227	0.029	0.181047	0.469143	0.406645
Fujian	2010	0.361674	0.252187	0.78329	0.609306	0.31435	0.887013	2.27594	0.0267	0.527061	0.495976	0.368764
Fujian	2011	0.25656	0.255571	0.822326	0.613594	0.304243	0.877318	2.2335	0.0228	0.582238	0.510527	0.25752
Fujian	2012	0.231093	0.260868	0.830138	0.646165	0.318429	0.870856	2.30911	0.0203	0.561388	0.528054	0.229838
Fujian	2013	0.248649	0.26753	0.838139	0.655766	0.325887	0.863632	2.40215	0.0189	0.546912	0.553387	0.246471
Fujian	2014	0.314126	0.275187	0.840904	0.701143	0.336795	0.867425	2.45951	0.0182	0.517014	0.561013	0.314226
Fujian	2015	0.458707	0.283598	0.841975	0.777409	0.383872	0.850796	2.60622	0.0184	0.457618	0.5605	0.465876
Fujian	2016	0.327357	0.290285	0.839175	0.879426	0.389129	0.855607	2.62514	0.0189	0.384992	0.559838	0.322401
Fujian	2017	0.475471	0.303483	0.841611	0.887317	0.405772	0.861589	2.58777	0.018	0.367323	0.54393	0.468025
Fujian	2018	0.431834	0.318197	0.843655	0.961662	0.411452	0.875085	2.50954	0.0082	0.352107	0.546517	0.408135
Fujian	2019	0.525667	0.332322	0.850279	1.07498	0.406669	0.88003	2.4172	0.0075	0.331632	0.538136	0.508008
Fujian	2020	0.574957	0.335528	0.855947	1.1155	0.403706	0.880388	2.64775	0.0079	0.339334	0.557974	0.554537
Fujian	2021	0.534321	0.343507	0.858113	1.06971	0.412114	0.893369	2.66308	0.0071	0.424792	0.555146	0.508509
Jiangxi	2010	0.355232	0.267364	0.783806	0.675337	0.373253	0.795032	1.66845	0.0365	0.167475	0.354966	0.369882
Jiangxi	2011	0.175546	0.282619	0.808729	0.723271	0.378193	0.781208	2.01866	0.0334	0.197454	0.382298	0.19185
Jiangxi	2012	0.303842	0.293799	0.815007	0.776967	0.392934	0.764265	2.15611	0.0333	0.189635	0.425891	0.318822
Jiangxi	2013	0.345313	0.277522	0.820908	0.821196	0.40367	0.757325	2.26884	0.0325	0.186783	0.451353	0.360533
Jiangxi	2014	0.366035	0.285144	0.816946	0.897597	0.422563	0.752186	2.38324	0.033	0.198242	0.472714	0.382182
Jiangxi	2015	0.342421	0.290778	0.819121	0.96783	0.342065	0.737049	2.60731	0.0353	0.183658	0.490918	0.361137
Jiangxi	2016	0.346797	0.294069	0.816862	1.01302	0.345201	0.748899	2.75435	0.0375	0.158228	0.479355	0.365153
Jiangxi	2017	0.417318	0.298594	0.812288	1.05815	0.351459	0.747092	2.92089	0.0387	0.159465	0.462285	0.436615
Jiangxi	2018	0.312624	0.303082	0.811572	1.12591	0.359362	0.750511	2.99561	0.0378	0.15419	0.463736	0.329696
Jiangxi	2019	0.264665	0.311361	0.810153	1.32953	0.411597	0.741082	3.00702	0.0378	0.149959	0.465136	0.282667
Jiangxi	2020	0.297981	0.315347	0.816406	1.3684	0.399951	0.741134	3.30916	0.0392	0.163594	0.486279	0.315567
Jiangxi	2021	0.398128	0.321272	0.822751	1.32219	0.40573	0.771136	3.19479	0.0344	0.18901	0.490158	0.418556
Shandong	2010	0.336383	0.493169	0.752835	0.499599	0.346616	0.877809	1.83374	0.0158	0.405318	0.475062	0.340259
Shandong	2011	0.255706	0.510278	0.785818	0.518032	0.35103	0.871955	1.7972	0.0159	0.438913	0.484507	0.256304
Shandong	2012	0.187669	0.518743	0.79186	0.549272	0.368779	0.862549	1.88596	0.0156	0.415485	0.502925	0.182283
Shandong	2013	0.377074	0.527581	0.795693	0.57791	0.386024	0.85872	1.93443	0.0158	0.409208	0.515192	0.378794
Shandong	2014	0.365152	0.539551	0.792186	0.727507	0.400851	0.858644	1.97819	0.0157	0.396446	0.522414	0.368021
Shandong	2015	0.407382	0.553881	0.791482	0.830213	0.41824	0.850783	2.0628	0.0161	0.316326	0.528125	0.41081
Shandong	2016	0.457967	0.541818	0.794789	0.877252	0.426828	0.851007	2.13367	0.0164	0.289893	0.530639	0.464429
Shandong	2017	0.435918	0.551958	0.796731	0.914833	0.432949	0.853069	2.14923	0.0166	0.305174	0.511981	0.442393
Shandong	2018	0.381974	0.560188	0.800612	0.986241	0.442568	0.848445	2.21235	0.0178	0.318891	0.514194	0.388547
Shandong	2019	0.494072	0.577569	0.804772	1.10219	0.432666	0.84775	2.68849	0.0143	0.306037	0.504871	0.50896
Shandong	2020	0.33088	0.573625	0.807629	1.17017	0.409163	0.84569	2.95683	0.0166	0.319726	0.524048	0.337285
Shandong	2021	0.489097	0.581865	0.799599	1.18919	0.414039	0.85904	2.90649	0.0167	0.397022	0.525201	0.49795
Henan	2010	0.22859	0.458534	0.78551	0.779346	0.43929	0.84921	1.68974	0.0183	0.057212	0.316703	0.24032
Henan	2011	0.213038	0.470792	0.820132	0.738291	0.425997	0.838563	1.63946	0.0242	0.0900983	0.323572	0.225982
Henan	2012	0.240667	0.473321	0.824899	0.733361	0.435154	0.827138	1.74598	0.0258	0.129853	0.341204	0.254554
Henan	2013	0.161376	0.469542	0.83432	0.772191	0.445143	0.823526	1.89812	0.0259	0.137774	0.364305	0.177619
Henan	2014	0.207941	0.47797	0.838028	0.883098	0.454699	0.825633	1.96356	0.0262	0.136594	0.377393	0.224283
Henan	2015	0.372197	0.483636	0.850242	0.943218	0.502464	0.816651	2.1367	0.0271	0.144616	0.383047	0.388646
Henan	2016	0.212273	0.473524	0.847217	0.979343	0.508241	0.814811	2.2356	0.0279	0.128607	0.382909	0.22877
Henan	2017	0.333353	0.477775	0.843799	1.06901	0.522004	0.81672	2.26275	0.0261	0.125885	0.374329	0.348739
Henan	2018	0.241552	0.485635	0.840533	1.09604	0.523241	0.815409	2.32443	0.0247	0.120546	0.38571	0.254641
Henan	2019	0.258012	0.499297	0.843747	1.20012	0.495814	0.81079	2.30685	0.0238	0.111633	0.391928	0.271814
Henan	2020	0.451394	0.496081	0.855352	1.3092	0.413984	0.808832	2.5331	0.0252	0.130302	0.417059	0.467807
Henan	2021	0.320706	0.500524	0.845786	1.39284	0.431117	0.833847	2.61511	0.0231	0.156776	0.404885	0.341186
Hubei	2010	0.257044	0.27723	0.775253	0.867371	0.371156	0.845849	2.23608	0.0172	0.116162	0.357806	0.267671
Hubei	2011	0.160297	0.292029	0.813805	0.805335	0.366505	0.8388	2.01768	0.0153	0.12242	0.410653	0.168875
Hubei	2012	0.345128	0.303215	0.819086	0.822697	0.375491	0.833571	2.06786	0.0161	0.102846	0.432795	0.354312
Hubei	2013	0.380888	0.329149	0.825992	0.858278	0.386224	0.827739	2.15527	0.0172	0.1042	0.461894	0.389261
Hubei	2014	0.231609	0.352437	0.822333	0.913832	0.396619	0.825291	2.20582	0.0178	0.110773	0.485057	0.235184
Hubei	2015	0.243749	0.360658	0.824254	0.996015	0.388946	0.79789	2.34298	0.0189	0.10912	0.506414	0.248072
Hubei	2016	0.270807	0.366057	0.829396	1.09674	0.396179	0.807424	2.50466	0.0206	0.0858421	0.503518	0.275058
Hubei	2017	0.396561	0.375422	0.829249	1.18476	0.406858	0.817342	2.53292	0.0209	0.0904568	0.487067	0.400725
Hubei	2018	0.41844	0.382239	0.82888	1.30685	0.415483	0.827275	2.53291	0.0201	0.0912994	0.478945	0.423828
Hubei	2019	0.49281	0.388824	0.829319	1.41555	0.419699	0.824557	2.40925	0.0194	0.091459	0.474422	0.50243
Hubei	2020	0.439922	0.398632	0.835742	1.35549	0.389122	0.803674	2.92406	0.0164	0.10521	0.427217	0.440007
Hubei	2021	0.44294	0.405912	0.835175	1.30277	0.403727	0.841368	2.78957	0.0098	0.120747	0.465163	0.446532
Hunan	2010	0.169388	0.302544	0.813242	0.899934	0.379422	0.826478	1.74256	0.0219	0.068404	0.341928	0.182135
Hunan	2011	0.344852	0.312205	0.836023	0.911156	0.381458	0.813864	1.67297	0.0202	0.0727985	0.37731	0.359635
Hunan	2012	0.340418	0.318512	0.828968	0.957356	0.397371	0.805774	1.75117	0.0207	0.0752296	0.395531	0.355746
Hunan	2013	0.190335	0.331908	0.832901	1.00889	0.407427	0.800771	1.82836	0.0219	0.0777204	0.411379	0.205595
Hunan	2014	0.389517	0.341322	0.829306	1.0574	0.419866	0.806139	1.88771	0.0233	0.086591	0.422136	0.408502
Hunan	2015	0.392921	0.347505	0.856091	1.13001	0.416505	0.799264	2.09128	0.0249	0.0746319	0.431618	0.411605
Hunan	2016	0.322465	0.339863	0.851566	1.1977	0.411888	0.79454	2.20368	0.0271	0.0618272	0.439308	0.342855
Hunan	2017	0.247769	0.341078	0.853116	1.26515	0.407988	0.796932	2.31777	0.0288	0.0774264	0.417787	0.267263
Hunan	2018	0.288571	0.355206	0.845523	1.29625	0.408799	0.794119	2.34601	0.0294	0.092985	0.414899	0.312624
Hunan	2019	0.306292	0.350832	0.847602	1.37264	0.398917	0.798606	2.39172	0.0314	0.114514	0.416925	0.331647
Hunan	2020	0.321996	0.351897	0.847465	1.43937	0.363015	0.797723	2.56848	0.0347	0.123678	0.435799	0.346287
Hunan	2021	0.388799	0.35705	0.852895	1.3769	0.355292	0.819259	2.57768	0.032	0.145808	0.431203	0.415734
Guangdong	2010	0.215418	0.351249	0.785039	0.749856	0.346087	0.881998	3.52025	0.0298	1.24177	0.577228	0.204448
Guangdong	2011	0.23988	0.359047	0.817087	0.704512	0.333439	0.873525	3.39706	0.0265	1.25108	0.574052	0.233251
Guangdong	2012	0.293728	0.365134	0.821641	0.738752	0.346495	0.870406	3.59281	0.026	1.25468	0.577187	0.296519
Guangdong	2013	0.254915	0.367159	0.819158	0.753513	0.355234	0.865431	3.75416	0.0247	1.26945	0.587992	0.256435
Guangdong	2014	0.293184	0.373429	0.816482	0.810174	0.36833	0.865744	3.68451	0.0243	1.14789	0.599715	0.302477
Guangdong	2015	0.451382	0.390501	0.820674	0.84485	0.343478	0.82835	4.31162	0.023	0.994524	0.615646	0.471291
Guangdong	2016	0.467963	0.399531	0.822894	0.875934	0.34665	0.836349	4.3393	0.0192	0.845131	0.626698	0.49451
Guangdong	2017	0.39793	0.408421	0.824279	1.09976	0.379954	0.835923	4.22846	0.0172	0.798412	0.616747	0.418592
Guangdong	2018	0.428151	0.408805	0.821836	1.14707	0.376539	0.842621	4.19034	0.0163	0.788708	0.61719	0.447664
Guangdong	2019	0.42979	0.416685	0.825052	1.52202	0.386159	0.839815	3.71923	0.0141	0.697773	0.615354	0.457962
Guangdong	2020	0.417566	0.436283	0.832053	1.61671	0.353437	0.84318	4.18305	0.0146	0.669665	0.635919	0.437271
Guangdong	2021	0.503289	0.441392	0.822883	1.53122	0.345117	0.853284	4.14412	0.011	0.747846	0.631993	0.53038
Guangxi	2010	0.148803	0.228334	0.848782	1.67018	0.321531	0.76526	2.17284	0.0065	0.150765	0.345761	0.15756
Guangxi	2011	0.103257	0.237081	0.877332	1.60802	0.326045	0.752883	2.06251	0.0056	0.164827	0.348597	0.113288
Guangxi	2012	0.258673	0.244656	0.878838	1.66511	0.332757	0.735904	2.17276	0.0036	0.1896	0.375417	0.272371
Guangxi	2013	0.145267	0.2493	0.880081	1.74305	0.343314	0.742242	2.24787	0.003	0.191684	0.387462	0.159135
Guangxi	2014	0.316323	0.259502	0.877584	2.07225	0.349785	0.743903	2.32054	0.0039	0.216916	0.388895	0.332789
Guangxi	2015	0.382691	0.264823	0.876532	2.25186	0.380635	0.725263	2.43484	0.0064	0.250961	0.386099	0.402026
Guangxi	2016	0.237445	0.265436	0.879578	2.42718	0.381748	0.724402	2.5177	0.0032	0.214806	0.38139	0.256838
Guangxi	2017	0.316186	0.271703	0.874529	2.51252	0.387537	0.724095	2.76009	0.003	0.236477	0.362276	0.338208
Guangxi	2018	0.321074	0.277388	0.880908	2.49697	0.383419	0.729428	2.77499	0.0016	0.230725	0.358557	0.347307
Guangxi	2019	0.336905	0.283895	0.882337	2.84755	0.367513	0.724493	2.92617	0.001	0.233501	0.364763	0.367787
Guangxi	2020	0.313764	0.289949	0.886874	3.16619	0.356916	0.72065	3.1531	0.0008	0.231377	0.36855	0.343574
Guangxi	2021	0.350544	0.296703	0.88618	3.2144	0.385721	0.765306	3.10137	0.0043	0.269471	0.355637	0.384176
Hainan	2010	0.245327	0.179497	0.832453	0.660932	0.384969	0.712279	3.26047	0.0496	0.311135	0.496135	0.255299
Hainan	2011	0.288905	0.187155	0.877021	0.653759	0.377799	0.683903	3.05431	0.039	0.376334	0.501235	0.300683
Hainan	2012	0.156908	0.190789	0.881201	0.75218	0.385903	0.673166	3.15153	0.0363	0.373215	0.521108	0.169454
Hainan	2013	0.321081	0.19478	0.871671	0.819333	0.3955	0.675481	3.33063	0.0353	0.349582	0.5428	0.336468
Hainan	2014	0.358749	0.203767	0.868791	1.02197	0.400397	0.681142	3.37627	0.0336	0.334307	0.558852	0.376831
Hainan	2015	0.256129	0.209941	0.869948	1.0606	0.487845	0.668087	3.85378	0.0415	0.271874	0.570037	0.275767
Hainan	2016	0.283173	0.216924	0.867335	1.08096	0.492001	0.663469	4.1333	0.0363	0.201676	0.561605	0.30174
Hainan	2017	0.373273	0.219644	0.866108	1.11409	0.502937	0.678939	4.15809	0.0349	0.167664	0.544954	0.393618
Hainan	2018	0.43857	0.222675	0.860501	1.27943	0.525713	0.655589	3.81424	0.0112	0.188481	0.557504	0.464936
Hainan	2019	0.435511	0.244471	0.859282	1.32228	0.492748	0.651347	3.62764	0.0198	0.179344	0.56361	0.46821
Hainan	2020	0.453147	0.250807	0.859875	1.32175	0.471435	0.645636	3.66825	0.0378	0.177428	0.578997	0.481998
Hainan	2021	0.411406	0.259007	0.858476	1.32206	0.500742	0.695551	3.3892	0.0245	0.255382	0.582296	0.447526
Chongqing	2010	0.180904	0.166036	0.816127	0.695374	0.400617	0.7881	3.10562	0.026	0.111998	0.510193	0.183442
Chongqing	2011	0.369945	0.172195	0.825669	0.635956	0.394299	0.747053	2.92907	0.0376	0.208936	0.570567	0.378582
Chongqing	2012	0.219282	0.176635	0.830038	0.668298	0.403053	0.737279	3.06918	0.0195	0.333517	0.580806	0.220461
Chongqing	2013	0.35143	0.179931	0.8367	0.681649	0.416829	0.764939	3.19127	0.0201	0.383271	0.56087	0.358216
Chongqing	2014	0.29157	0.194944	0.835871	0.790924	0.434283	0.77404	3.21055	0.0182	0.474345	0.574076	0.294499
Chongqing	2015	0.26283	0.202057	0.832048	0.990915	0.460332	0.763598	3.29154	0.0149	0.337449	0.583625	0.26392
Chongqing	2016	0.266187	0.209454	0.831413	1.15669	0.471229	0.777961	3.25154	0.0104	0.25309	0.579535	0.26278
Chongqing	2017	0.381976	0.217008	0.83105	1.28347	0.470641	0.783902	3.25724	0.0079	0.241255	0.552901	0.384101
Chongqing	2018	0.42439	0.223619	0.833689	1.36586	0.475457	0.789662	3.3951	0.0106	0.266044	0.540844	0.428555
Chongqing	2019	0.432846	0.231642	0.832662	1.40759	0.457849	0.79464	3.24447	0.0069	0.258501	0.513946	0.435415
Chongqing	2020	0.471076	0.240823	0.843332	1.4496	0.428506	0.804566	3.39015	0.0058	0.273381	0.526909	0.474626
Chongqing	2021	0.450206	0.247747	0.84373	1.42139	0.448149	0.826663	3.32816	0.0052	0.322658	0.523513	0.453578
Sichuan	2010	0.159631	0.306072	0.797272	1.20944	0.3328	0.752799	2.87623	0.0237	0.137967	0.379894	0.173082
Sichuan	2011	0.341501	0.318193	0.838864	1.26749	0.333208	0.777923	2.73393	0.0291	0.16479	0.399946	0.355844
Sichuan	2012	0.128508	0.329258	0.847672	1.22603	0.33074	0.772139	2.83754	0.0259	0.179707	0.420162	0.144499
Sichuan	2013	0.338654	0.339718	0.850044	1.15117	0.321658	0.765408	2.97138	0.0241	0.177004	0.438139	0.355416
Sichuan	2014	0.190396	0.340437	0.854568	1.07027	0.316941	0.764752	3.05013	0.0221	0.176625	0.445276	0.21083
Sichuan	2015	0.342601	0.348491	0.851934	1.13653	0.468951	0.7529	3.26683	0.0207	0.122629	0.449815	0.365838
Sichuan	2016	0.283408	0.353482	0.852129	1.12667	0.479922	0.758321	3.35318	0.0161	0.108151	0.441412	0.309148
Sichuan	2017	0.405871	0.377952	0.850469	1.12017	0.476294	0.770618	3.3051	0.0148	0.130602	0.426932	0.430719
Sichuan	2018	0.345271	0.386918	0.849728	1.19735	0.479857	0.773729	3.23242	0.0146	0.152351	0.43598	0.370249
Sichuan	2019	0.292872	0.388124	0.861262	1.3915	0.44535	0.776805	3.0649	0.0137	0.15427	0.434915	0.321427
Sichuan	2020	0.407642	0.401469	0.856859	1.46098	0.439422	0.76911	3.28929	0.0143	0.175192	0.464791	0.43636
Sichuan	2021	0.377953	0.405951	0.853986	1.4132	0.454615	0.791727	3.35033	0.004	0.199002	0.468218	0.407267
Guizhou	2010	0.108493	0.168969	0.80641	0.89726	0.353784	0.638973	2.84898	0.0043	0.0506162	0.326225	0.112998
Guizhou	2011	0.176995	0.176651	0.838201	0.979227	0.349248	0.599437	2.90866	0.0058	0.0632645	0.365344	0.184567
Guizhou	2012	0.155268	0.188169	0.848212	0.958481	0.348989	0.591279	2.74581	0.0045	0.0714952	0.406186	0.162513
Guizhou	2013	0.152853	0.187643	0.854972	0.993898	0.347574	0.613367	2.88979	0.0044	0.075578	0.430012	0.161414
Guizhou	2014	0.35419	0.210363	0.853304	1.04939	0.361533	0.613784	2.98191	0.0031	0.0853524	0.442359	0.368511
Guizhou	2015	0.241653	0.222255	0.845524	1.135	0.469249	0.626269	3.28402	0.0025	0.0842757	0.447412	0.254131
Guizhou	2016	0.3575	0.224151	0.845012	1.21317	0.488403	0.63855	3.53483	0.0055	0.0351323	0.44425	0.374877
Guizhou	2017	0.246258	0.233658	0.850936	1.26238	0.500406	0.660979	3.46724	0.0041	0.0436078	0.422767	0.26079
Guizhou	2018	0.382135	0.238504	0.847338	1.21091	0.514359	0.672402	3.45717	0.0027	0.0359949	0.426295	0.39808
Guizhou	2019	0.307152	0.243321	0.852225	1.53544	0.437405	0.64526	3.31673	0.0028	0.0284703	0.42036	0.321456
Guizhou	2020	0.207245	0.248036	0.855956	1.52463	0.399353	0.678647	3.39449	0.0017	0.0321948	0.441396	0.213332
Guizhou	2021	0.348855	0.254718	0.850771	1.42733	0.395325	0.714597	3.37038	0.0015	0.0375939	0.441203	0.371749
Yunnan	2010	0.345648	0.204894	0.9389	1.67655	0.379143	0.704508	3.31944	0.0125	0.126202	0.374019	0.356649
Yunnan	2011	0.103384	0.211545	0.95248	1.54495	0.392024	0.692369	3.0958	0.0126	0.122345	0.387326	0.108237
Yunnan	2012	0.188711	0.222507	0.954168	1.55569	0.396417	0.678063	3.08999	0.0134	0.13764	0.411474	0.19633
Yunnan	2013	0.250159	0.229947	0.955298	1.46091	0.395013	0.680596	3.08902	0.0132	0.143407	0.440889	0.258614
Yunnan	2014	0.216265	0.24602	0.956982	1.46167	0.395839	0.683943	3.15539	0.013	0.153265	0.437848	0.225117
Yunnan	2015	0.181564	0.253992	0.957754	1.46779	0.464833	0.684971	3.36863	0.0137	0.118999	0.436419	0.192357
Yunnan	2016	0.197309	0.262171	0.959563	1.4131	0.468209	0.693392	3.43393	0.0039	0.0883782	0.42711	0.207865
Yunnan	2017	0.353864	0.274482	0.957626	1.31325	0.472035	0.690957	3.38066	0.004	0.0922111	0.409563	0.36696
Yunnan	2018	0.402472	0.278108	0.959872	1.14425	0.481717	0.709059	3.27501	0.0039	0.103939	0.410865	0.417393
Yunnan	2019	0.321921	0.278704	0.96053	1.45371	0.455525	0.708485	2.75676	0.0021	0.105454	0.409856	0.336059
Yunnan	2020	0.342005	0.288188	0.960527	1.19491	0.391961	0.715992	2.86365	0.0021	0.115825	0.43334	0.35875
Yunnan	2021	0.331102	0.293882	0.95712	1.53017	0.389549	0.755612	2.7811	0.0078	0.130345	0.428635	0.35071
Tibet	2010	0.253066	0.22735	0.83282	0.677353	0.321776	-0.0743615	3.14712	0.0032	0.118487	0.277783	0.258573
Tibet	2011	0.0680282	0.224317	0.864123	0.628037	0.311741	-0.239755	3.41679	0.0069	0.161467	0.317788	0.06635
Tibet	2012	0.119243	0.221479	0.864085	0.620477	0.316985	-0.274768	3.87193	0.0006	0.350456	0.399417	0.119684
Tibet	2013	0.130645	0.276817	0.865498	0.629235	0.323656	-0.224716	4.38385	0.0004	0.291332	0.405046	0.131064
Tibet	2014	0.281029	0.312114	0.863286	0.683679	0.334581	-0.261583	5.10529	0.0004	0.174425	0.449363	0.286327
Tibet	2015	0.115425	0.316904	0.860374	0.808412	0.380598	-0.324506	5.63546	0.0003	0.0636866	0.453505	0.114579
Tibet	2016	0.175704	0.319785	0.851998	0.865584	0.395921	-0.353777	6.44195	0.0003	0.0484538	0.468855	0.177765
Tibet	2017	0.141239	0.321992	0.85306	0.852208	0.393227	-0.246805	6.86079	0.0003	0.0465252	0.47889	0.140327
Tibet	2018	0.166894	0.322877	0.852853	0.859607	0.389156	-0.27272	6.41832	0.0002	0.0339488	0.516942	0.163987
Tibet	2019	0.224895	0.324054	0.853422	0.986707	0.395957	-0.288579	5.69503	0.0002	0.0300917	0.492616	0.227819
Tibet	2020	0.288635	0.328714	0.857828	1.10466	0.366891	-0.161991	5.45265	0.0002	0.0118631	0.507705	0.287806
Tibet	2021	0.257049	0.334382	0.860845	0.984539	0.343965	0.0255697	5.15901	0.0002	0.0216645	0.476386	0.258154
Shaanxi	2010	0.315903	0.234184	0.827907	0.774067	0.348359	0.774628	2.61661	0.0122	0.0893478	0.447393	0.3219
Shaanxi	2011	0.271895	0.242449	0.851506	0.825875	0.353141	0.759278	2.48494	0.0122	0.0874474	0.511564	0.275206
Shaanxi	2012	0.279033	0.250475	0.854023	0.872896	0.365368	0.764976	2.52692	0.0128	0.0760629	0.505617	0.280059
Shaanxi	2013	0.334529	0.253752	0.858761	0.910161	0.374177	0.769571	2.5792	0.0141	0.0919857	0.510733	0.336374
Shaanxi	2014	0.242918	0.26144	0.859627	1.02842	0.390284	0.772303	2.65397	0.0145	0.114298	0.513205	0.237738
Shaanxi	2015	0.39545	0.250886	0.863946	1.33939	0.403089	0.755511	3.00612	0.016	0.123856	0.516817	0.400683
Shaanxi	2016	0.39707	0.245557	0.863964	1.47141	0.414451	0.769536	3.05044	0.0172	0.114293	0.476671	0.402138
Shaanxi	2017	0.317908	0.246808	0.860027	1.57638	0.429791	0.774923	2.94368	0.0182	0.136087	0.470094	0.313422
Shaanxi	2018	0.391224	0.25158	0.865679	1.62098	0.416635	0.778529	2.9086	0.0185	0.161834	0.484124	0.387963
Shaanxi	2019	0.349825	0.254387	0.863471	1.67879	0.424429	0.778294	3.05793	0.0207	0.143817	0.478051	0.341793
Shaanxi	2020	0.374173	0.259178	0.870121	1.7414	0.402852	0.772034	3.38534	0.0222	0.15255	0.493365	0.366427
Shaanxi	2021	0.411474	0.264123	0.867144	1.56118	0.394122	0.796342	3.32218	0.0213	0.179421	0.520155	0.400773
Gansu	2010	0.27365	0.14895	0.917108	0.632368	0.259917	0.627614	2.84495	0.0022	0.136447	0.303569	0.282909
Gansu	2011	0.0685725	0.155344	0.932955	0.553929	0.24748	0.628134	2.82791	0.0009	0.131716	0.316762	0.07219
Gansu	2012	0.287687	0.165225	0.936319	0.571518	0.253652	0.618112	3.06649	0.0007	0.119964	0.330562	0.298689
Gansu	2013	0.135463	0.173592	0.934913	0.572236	0.258994	0.615991	3.30025	0.0007	0.123708	0.352189	0.143765
Gansu	2014	0.217087	0.182344	0.934497	0.691139	0.269524	0.610105	3.66161	0.0009	0.0963532	0.361932	0.228885
Gansu	2015	0.142187	0.193179	0.934301	0.828959	0.287375	0.548804	4.42224	0.001	0.0881579	0.370585	0.157766
Gansu	2016	0.271555	0.194329	0.930125	0.88107	0.299282	0.543996	4.64449	0.0011	0.0718997	0.375331	0.292103
Gansu	2017	0.32588	0.226721	0.924512	1.05299	0.321126	0.549601	4.75669	0.0004	0.0478167	0.358249	0.348927
Gansu	2018	0.252472	0.212427	0.923426	1.0826	0.314076	0.534528	4.6143	0.0004	0.0539326	0.362891	0.279057
Gansu	2019	0.376917	0.220604	0.926924	1.29709	0.319796	0.546746	4.63925	0.0006	0.0460232	0.348618	0.407105
Gansu	2020	0.19268	0.228841	0.929176	1.33625	0.291857	0.536354	4.7858	0.0007	0.0447615	0.373706	0.22539
Gansu	2021	0.282024	0.239437	0.926378	1.24674	0.283224	0.606322	4.5415	0.0006	0.0540017	0.383233	0.314825
Qinghai	2010	0.343163	0.154994	0.880764	0.848462	0.247684	0.350288	3.06739	0.011	0.0501206	0.381697	0.354201
Qinghai	2011	0.086595	0.165073	0.898995	0.816096	0.245218	0.294024	3.02756	0.0065	0.0490006	0.412639	0.091122
Qinghai	2012	0.184455	0.171046	0.904752	0.84746	0.252211	0.241708	3.33771	0.0069	0.0550436	0.441327	0.195464
Qinghai	2013	0.371706	0.178172	0.902397	0.851505	0.259353	0.283225	3.53464	0.0027	0.0595124	0.471024	0.388824
Qinghai	2014	0.325139	0.183957	0.899975	0.890124	0.267868	0.270753	3.77785	0.0013	0.0675812	0.482551	0.343738
Qinghai	2015	0.188855	0.18619	0.900198	0.93825	0.357102	0.246564	4.22036	0.0014	0.0699219	0.480395	0.207043
Qinghai	2016	0.313875	0.193379	0.901733	0.966482	0.356815	0.324772	4.33429	0.0004	0.0492227	0.440866	0.334003
Qinghai	2017	0.273157	0.201982	0.901285	1.02012	0.364071	0.379157	4.59044	0.0005	0.019336	0.420328	0.291319
Qinghai	2018	0.302395	0.212314	0.895764	1.07563	0.358984	0.400499	4.3058	0.0001	0.0192347	0.433284	0.320149
Qinghai	2019	0.258664	0.226742	0.889575	1.18875	0.373325	0.366336	4.20991	0.0016	0.0134649	0.430302	0.276404
Qinghai	2020	0.391959	0.235132	0.892034	1.22662	0.331943	0.357818	4.28522	0.0006	0.00803727	0.461678	0.416563
Qinghai	2021	0.342851	0.242501	0.888113	1.05674	0.29523	0.44585	4.06188	0.0001	0.0106428	0.460843	0.362756
Ningxia	2010	0.22006	0.108673	0.867023	0.681554	0.254916	0.645269	2.94282	0.0032	0.0906456	0.433622	0.227143
Ningxia	2011	0.141068	0.110699	0.893483	0.695967	0.251496	0.634584	2.77205	0.0062	0.086006	0.471568	0.143129
Ningxia	2012	0.236993	0.116542	0.897385	0.776428	0.255299	0.594388	2.91933	0.0059	0.0756116	0.492123	0.243999
Ningxia	2013	0.241374	0.130135	0.899647	0.83006	0.258117	0.603695	3.01781	0.0036	0.10048	0.512419	0.250402
Ningxia	2014	0.340209	0.137418	0.896937	0.958708	0.262739	0.595598	3.19303	0.0021	0.159697	0.516829	0.355097
Ningxia	2015	0.345904	0.144309	0.896262	1.1593	0.297014	0.558622	3.40788	0.004	0.105373	0.521764	0.364995
Ningxia	2016	0.235798	0.154032	0.896476	1.19378	0.311429	0.548954	3.50611	0.0053	0.0849993	0.517789	0.25419
Ningxia	2017	0.258223	0.162366	0.897629	1.15432	0.29864	0.571046	3.53735	0.0061	0.114462	0.505485	0.269926
Ningxia	2018	0.330293	0.166462	0.895252	1.13428	0.281095	0.595732	3.46432	0.0038	0.0782038	0.502929	0.346689
Ningxia	2019	0.337117	0.169866	0.892946	1.46384	0.266013	0.616303	3.70497	0.0046	0.0676678	0.482624	0.358428
Ningxia	2020	0.286974	0.18006	0.895772	1.49055	0.221959	0.625822	3.85612	0.0048	0.0327484	0.498141	0.297249
Ningxia	2021	0.357276	0.18736	0.893278	1.28367	0.224269	0.684256	3.52586	0.0042	0.0533631	0.494919	0.374051
Xinjiang	2010	0.11386	0.236563	0.885217	0.660996	0.289925	0.683051	2.54601	0.003	0.232296	0.419612	0.121394
Xinjiang	2011	0.179398	0.248045	0.908148	0.624046	0.277975	0.650262	2.51998	0.0033	0.253937	0.459778	0.187214
Xinjiang	2012	0.346455	0.257871	0.909678	0.639721	0.28793	0.633008	2.69741	0.0034	0.246844	0.493976	0.358766
Xinjiang	2013	0.170754	0.28918	0.909331	0.676866	0.30232	0.634545	2.83393	0.0035	0.238708	0.52868	0.182574
Xinjiang	2014	0.178516	0.294892	0.90621	0.770034	0.318376	0.641881	2.88207	0.0028	0.217113	0.540683	0.187309
Xinjiang	2015	0.34524	0.301569	0.90421	0.80145	0.230126	0.591178	3.23492	0.003	0.15362	0.527039	0.360532
Xinjiang	2016	0.408208	0.299021	0.903958	0.927919	0.243594	0.570311	3.45092	0.0028	0.13312	0.507224	0.42826
Xinjiang	2017	0.203463	0.303601	0.897235	1.25737	0.288428	0.584473	3.50381	0.0012	0.133969	0.505096	0.217206
Xinjiang	2018	0.231702	0.305575	0.895523	1.28217	0.280655	0.60869	3.29653	0.0011	0.11349	0.499857	0.242337
Xinjiang	2019	0.255845	0.312683	0.894533	1.25101	0.293455	0.609072	3.18105	0.0017	0.126736	0.493254	0.271407
Xinjiang	2020	0.246467	0.317997	0.898221	1.23276	0.274226	0.599067	3.42106	0.0011	0.112575	0.493126	0.257616
Xinjiang	2021	0.333969	0.321572	0.897945	0.950993	0.246674	0.663598	3.26401	0.001	0.110508	0.491221	0.349541

## Sheet: CODE
CP	Common Prosperity
RR	Rural Revitalization
FD	Fiscal Decentralization
IS	Industrial Structure
SC	Social Consumption Levels
LM	Marketization Level
LF	Financial Economic Level
FDI	FDI Level
OPEN	Degree of Regional Openness
FD1	FD_INCOME
CP1	CP1
