# Supplementary material for: How Does China's Local Fiscal Decentralization Promote Common Prosperity? An Analysis of the Mediating Role of Rural Revitalization
Source: Research Square preprint supplement (doi:10.21203/rs.3.rs-6733019/v1), 2025-05-30
Supplement: Supplementary file 2 [file 7fef98c2bdbbcdf10ce3aea3.xlsx]

## Sheet: Common Prosperity
Province	YEAR	Gini coefficient	urban–rural income gap Theil index	Engel coefficient	Per capita disposable income	per capita GDP	Income disparity between urban and rural residents	Per capita consumption expenditure
Beijing	2010	0.362	0.034	0.319154	29228	78307	2.598	21834
Beijing	2011	0.43	0.034	0.315378	33176	86246	2.646	24298
Beijing	2012	0.432	0.034	0.315606	36817	92758	2.623	26562
Beijing	2013	0.457	0.033	0.2402	40830	100569	2.606	29176
Beijing	2014	0.444	0.032	0.240098	44489	106732	2.572	31103
Beijing	2015	0.429	0.032	0.224367	48458	113692	2.57	33803
Beijing	2016	0.492	0.031	0.214835	52530	123391	2.567	35416
Beijing	2017	0.398	0.031	0.201706	57230	136172	2.575	37425
Beijing	2018	0.39	0.031	0.20242	62361	150962	2.567	39843
Beijing	2019	0.435	0.03	0.197233	67756	161776	2.553	43038
Beijing	2020	0.352	0.029	0.215249	69434	164158	2.51	38903
Beijing	2021	0.417	0.027	0.213257	75002	183980	2.448	43640
Tianjin	2010	0.416	0.037	0.371245	19266	54053	2.233	14711
Tianjin	2011	0.384	0.029	0.360297	21714	61458	2.023	16796
Tianjin	2012	0.355	0.025	0.366123	24030	66517	1.956	18542
Tianjin	2013	0.41	0.022	0.362777	26359	71345	1.888	20419
Tianjin	2014	0.353	0.021	0.330155	28832	74960	1.852	22343
Tianjin	2015	0.442	0.02	0.319085	31291	75868	1.845	24162
Tianjin	2016	0.437	0.02	0.306958	34074	79647	1.848	26129
Tianjin	2017	0.417	0.019	0.310581	37022	87280	1.852	27841
Tianjin	2018	0.356	0.019	0.289184	39506	95689	1.863	29903
Tianjin	2019	0.363	0.019	0.282032	42404	101557	1.859	31854
Tianjin	2020	0.442	0.018	0.299213	43854	101068	1.855	28461
Tianjin	2021	0.399	0.018	0.275349	47449	113732	1.842	33188
Hebei	2010	0.493	0.113	0.338923	10428	25308	2.662	7583
Hebei	2011	0.462	0.1	0.336661	12059	29647	2.505	8852
Hebei	2012	0.381	0.097	0.337649	13647	31844	2.479	9773
Hebei	2013	0.383	0.091	0.279845	15190	33346	2.419	10872
Hebei	2014	0.418	0.086	0.273534	16647	34507	2.37	11932
Hebei	2015	0.449	0.083	0.269786	18118	35994	2.366	13031
Hebei	2016	0.466	0.081	0.268056	19725	38688	2.37	14247
Hebei	2017	0.394	0.079	0.25347	21484	41451	2.372	15437
Hebei	2018	0.429	0.076	0.255428	23446	43808	2.35	16722
Hebei	2019	0.42	0.072	0.259948	25665	47036	2.325	17987
Hebei	2020	0.356	0.067	0.27679	27136	48302	2.264	18037
Hebei	2021	0.42	0.061	0.282956	29383	54172	2.189	19954
Shanxi	2010	0.37	0.13	0.344734	10149	25434	2.947	7011
Shanxi	2011	0.478	0.123	0.345375	11959	30534	2.886	8404
Shanxi	2012	0.494	0.119	0.324859	13592	32864	2.864	9446
Shanxi	2013	0.42	0.112	0.266042	15120	33848	2.8	10118
Shanxi	2014	0.494	0.105	0.270668	16538	34248	2.732	10864
Shanxi	2015	0.492	0.103	0.263401	17854	33593	2.732	11729
Shanxi	2016	0.485	0.099	0.244278	19049	33972	2.713	12683
Shanxi	2017	0.393	0.096	0.243319	20420	41242	2.7	13664
Shanxi	2018	0.41	0.09	0.249036	21990	45517	2.641	14810
Shanxi	2019	0.367	0.084	0.25199	23828	48469	2.578	15863
Shanxi	2020	0.45	0.078	0.27728	25214	51051	2.507	15733
Shanxi	2021	0.436	0.073	0.268882	27426	64821	2.445	17191
Nei Mongol	2010	0.476	0.128	0.334151	12538	33262	3.123	10209
Nei Mongol	2011	0.369	0.117	0.33976	14715	38276	2.998	11920
Nei Mongol	2012	0.462	0.112	0.335273	16800	42441	2.968	13475
Nei Mongol	2013	0.445	0.105	0.289952	18693	46320	2.894	14878
Nei Mongol	2014	0.458	0.1	0.291941	20559	49585	2.842	16258
Nei Mongol	2015	0.489	0.097	0.286394	22310	52972	2.839	17179
Nei Mongol	2016	0.449	0.094	0.286021	24127	56560	2.84	18072
Nei Mongol	2017	0.47	0.091	0.274749	26212	61196	2.835	18946
Nei Mongol	2018	0.415	0.086	0.270747	28376	66491	2.775	19665
Nei Mongol	2019	0.456	0.079	0.265976	30555	71170	2.668	20743
Nei Mongol	2020	0.399	0.069	0.287256	31497	71640	2.496	19794
Nei Mongol	2021	0.442	0.064	0.277991	34108	85422	2.42	22658
Liaoning	2010	0.425	0.093	0.362748	13953	31888	2.771	10462
Liaoning	2011	0.452	0.084	0.36794	16429	37353	2.667	11954
Liaoning	2012	0.481	0.081	0.36168	18761	40778	2.675	13489
Liaoning	2013	0.509	0.077	0.324348	20818	43956	2.627	14950
Liaoning	2014	0.489	0.075	0.28347	22820	45915	2.599	16068
Liaoning	2015	0.371	0.072	0.282447	24576	46482	2.582	17200
Liaoning	2016	0.424	0.069	0.274914	26040	47069	2.552	19853
Liaoning	2017	0.373	0.067	0.273923	27835	50221	2.546	20463
Liaoning	2018	0.412	0.066	0.267677	29701	54657	2.548	21398
Liaoning	2019	0.399	0.061	0.26828	31820	58019	2.469	22203
Liaoning	2020	0.485	0.052	0.295571	32738	58629	2.314	20672
Liaoning	2021	0.431	0.048	0.290196	35112	65026	2.24	23831
Jilin	2010	0.393	0.079	0.343401	10798	23370	2.328	8176
Jilin	2011	0.384	0.072	0.339117	12621	28270	2.233	9442
Jilin	2012	0.509	0.069	0.339739	14395	32005	2.214	10737
Jilin	2013	0.493	0.066	0.308821	15998	35139	2.181	12054
Jilin	2014	0.426	0.063	0.271116	17520	37539	2.154	13026
Jilin	2015	0.424	0.065	0.267617	18684	38128	2.199	13764
Jilin	2016	0.416	0.063	0.267318	19967	40259	2.188	14773
Jilin	2017	0.461	0.062	0.265105	21368	42890	2.187	15632
Jilin	2018	0.496	0.061	0.256818	22798	44925	2.195	17200
Jilin	2019	0.406	0.059	0.258662	24563	47554	2.162	18075
Jilin	2020	0.403	0.052	0.28997	25751	50561	2.079	17318
Jilin	2021	0.423	0.048	0.280516	27770	55450	2.021	19605
Heilongjiang	2010	0.412	0.084	0.346996	10846	21694	2.441	8619
Heilongjiang	2011	0.377	0.071	0.356648	12605	26093	2.262	9967
Heilongjiang	2012	0.388	0.07	0.368763	14302	29352	2.258	10750
Heilongjiang	2013	0.408	0.067	0.355483	15903	32068	2.225	12037
Heilongjiang	2014	0.353	0.061	0.277078	17404	33464	2.163	12769
Heilongjiang	2015	0.358	0.061	0.276369	18593	32759	2.181	13403
Heilongjiang	2016	0.385	0.06	0.276686	19838	34025	2.175	14446
Heilongjiang	2017	0.415	0.059	0.270199	21206	35887	2.167	15577
Heilongjiang	2018	0.427	0.054	0.269106	22726	38199	2.115	16994
Heilongjiang	2019	0.361	0.05	0.263979	24254	41156	2.065	18111
Heilongjiang	2020	0.486	0.04	0.309981	24902	42432	1.924	17056
Heilongjiang	2021	0.444	0.038	0.304416	27159	47266	1.881	20636
Shanghai	2010	0.446	0.022	0.338993	30436	79396	2.378	24758
Shanghai	2011	0.365	0.022	0.35992	34731	85897	2.356	26858
Shanghai	2012	0.356	0.022	0.371428	38550	89613	2.357	28152
Shanghai	2013	0.368	0.021	0.35391	42174	95746	2.336	30400
Shanghai	2014	0.51	0.021	0.272543	45966	102827	2.305	33065
Shanghai	2015	0.423	0.022	0.266548	49867	109186	2.282	34784
Shanghai	2016	0.358	0.021	0.255322	54305	121369	2.261	37458
Shanghai	2017	0.351	0.021	0.251457	58988	133489	2.25	39792
Shanghai	2018	0.424	0.02	0.24747	64183	145767	2.24	43351
Shanghai	2019	0.477	0.02	0.240162	69442	153299	2.218	45605
Shanghai	2020	0.371	0.019	0.263886	72232	156803	2.189	42536
Shanghai	2021	0.408	0.018	0.25787	78027	173630	2.14	48879
Jiangsu	2010	0.45	0.078	0.371307	17006	52787	2.456	12266
Jiangsu	2011	0.376	0.071	0.370118	19820	61464	2.38	14635
Jiangsu	2012	0.494	0.07	0.361399	22432	66533	2.374	16500
Jiangsu	2013	0.412	0.065	0.290476	24776	72768	2.336	17926
Jiangsu	2014	0.481	0.061	0.29179	27173	78711	2.296	19164
Jiangsu	2015	0.458	0.058	0.288777	29539	85871	2.287	20556
Jiangsu	2016	0.495	0.056	0.283131	32070	92658	2.281	22130
Jiangsu	2017	0.383	0.054	0.278022	35024	102202	2.277	23469
Jiangsu	2018	0.404	0.051	0.261114	38096	110508	2.264	25007
Jiangsu	2019	0.389	0.049	0.256468	41400	116650	2.252	26697
Jiangsu	2020	0.491	0.045	0.276771	43390	121333	2.194	26225
Jiangsu	2021	0.422	0.043	0.275365	47498	137039	2.155	31451
Zhejiang	2010	0.454	0.06	0.342635	21159	51110	2.183	15634
Zhejiang	2011	0.378	0.056	0.357311	24195	57828	2.137	17874
Zhejiang	2012	0.47	0.056	0.360645	27020	61097	2.141	18931
Zhejiang	2013	0.364	0.053	0.290683	29775	65105	2.12	20610
Zhejiang	2014	0.351	0.05	0.29129	32658	68569	2.085	22552
Zhejiang	2015	0.414	0.048	0.289248	35537	73276	2.069	24117
Zhejiang	2016	0.461	0.046	0.290451	38529	78384	2.066	25527
Zhejiang	2017	0.478	0.044	0.286229	42046	85612	2.054	27079
Zhejiang	2018	0.417	0.042	0.278184	45840	93230	2.036	29471
Zhejiang	2019	0.422	0.039	0.278803	49899	98770	2.014	32026
Zhejiang	2020	0.483	0.036	0.2851	52397	100738	1.964	31295
Zhejiang	2021	0.421	0.035	0.277088	57541	113032	1.943	36668
Anhui	2010	0.376	0.117	0.395388	9955	21923	2.695	7297
Anhui	2011	0.496	0.115	0.407404	11873	27303	2.693	8683
Anhui	2012	0.412	0.11	0.390407	13593	30697	2.649	9878
Anhui	2013	0.495	0.103	0.393607	15154	34404	2.575	10544
Anhui	2014	0.368	0.096	0.34136	16796	37580	2.505	11727
Anhui	2015	0.453	0.093	0.344558	18363	39692	2.489	12840
Anhui	2016	0.439	0.091	0.331728	19998	43686	2.488	14712
Anhui	2017	0.484	0.088	0.326527	21863	49092	2.48	15752
Anhui	2018	0.464	0.085	0.317676	23984	56063	2.457	17045
Anhui	2019	0.48	0.082	0.317745	26415	60561	2.435	19137
Anhui	2020	0.465	0.076	0.332698	28103	62411	2.373	18877
Anhui	2021	0.437	0.072	0.325984	30904	70321	2.341	21911
Fujian	2010	0.375	0.094	0.422167	14566	40773	2.63	11474
Fujian	2011	0.449	0.087	0.422159	16909	47928	2.544	13218
Fujian	2012	0.481	0.084	0.420857	19141	52959	2.524	14843
Fujian	2013	0.491	0.079	0.351305	21218	58255	2.47	16177
Fujian	2014	0.453	0.074	0.344693	23331	63709	2.429	17644
Fujian	2015	0.362	0.071	0.341639	25404	67649	2.412	18850
Fujian	2016	0.477	0.069	0.342483	27608	74024	2.401	20167
Fujian	2017	0.387	0.066	0.339433	30048	83758	2.388	21249
Fujian	2018	0.447	0.063	0.329314	32644	94719	2.364	22996
Fujian	2019	0.399	0.06	0.319804	35616	102722	2.331	25314
Fujian	2020	0.367	0.055	0.333723	37202	105818	2.259	25126
Fujian	2021	0.436	0.051	0.322344	40659	116939	2.202	28440
Jiangxi	2010	0.358	0.11	0.433307	10217	21099	2.613	7291
Jiangxi	2011	0.467	0.097	0.427294	11870	25928	2.48	8361
Jiangxi	2012	0.401	0.096	0.417147	13567	28624	2.479	9182
Jiangxi	2013	0.383	0.091	0.343233	15100	31952	2.434	10053
Jiangxi	2014	0.375	0.087	0.341405	16734	34988	2.403	11089
Jiangxi	2015	0.396	0.083	0.33714	18437	37436	2.379	12403
Jiangxi	2016	0.4	0.08	0.331921	20110	40950	2.362	13259
Jiangxi	2017	0.36	0.078	0.319944	22031	44878	2.356	14459
Jiangxi	2018	0.442	0.075	0.304522	24080	50347	2.339	15792
Jiangxi	2019	0.505	0.071	0.29547	26262	54640	2.314	17650
Jiangxi	2020	0.478	0.067	0.321945	28017	57065	2.271	17955
Jiangxi	2021	0.423	0.063	0.321268	30610	65560	2.231	20290
Shandong	2010	0.385	0.11	0.348347	12922	35599	2.697	8560
Shandong	2011	0.44	0.1	0.344331	15077	40581	2.582	9853
Shandong	2012	0.508	0.098	0.336236	17127	44348	2.577	10902
Shandong	2013	0.384	0.092	0.299318	19008	48673	2.515	11897
Shandong	2014	0.4	0.086	0.295021	20864	51933	2.459	13329
Shandong	2015	0.381	0.082	0.285776	22703	56205	2.44	14578
Shandong	2016	0.351	0.079	0.281892	24685	59239	2.437	15926
Shandong	2017	0.381	0.076	0.272852	26930	62993	2.433	17281
Shandong	2018	0.431	0.075	0.267891	29205	66284	2.427	18780
Shandong	2019	0.359	0.072	0.265173	31597	69901	2.381	20427
Shandong	2020	0.506	0.067	0.274942	32886	71825	2.332	20940
Shandong	2021	0.398	0.062	0.27151	35705	81727	2.263	22821
Henan	2010	0.434	0.116	0.356062	9520	23984	2.645	6831
Henan	2011	0.448	0.105	0.353136	11206	27901	2.527	7968
Henan	2012	0.438	0.101	0.337276	12772	30497	2.492	9103
Henan	2013	0.504	0.094	0.339022	14204	33114	2.424	10002
Henan	2014	0.474	0.089	0.291117	15695	35982	2.375	11000
Henan	2015	0.376	0.087	0.285059	17125	38338	2.357	11835
Henan	2016	0.491	0.083	0.282022	18443	41326	2.328	12712
Henan	2017	0.415	0.081	0.268544	20170	45723	2.324	13730
Henan	2018	0.5	0.078	0.261052	21964	50714	2.305	15169
Henan	2019	0.502	0.073	0.25636	23903	54356	2.255	16332
Henan	2020	0.354	0.064	0.273679	24810	54691	2.157	16143
Henan	2021	0.461	0.061	0.284455	26811	59410	2.116	18391
Hubei	2010	0.424	0.095	0.409131	11069	28359	2.493	8090
Hubei	2011	0.498	0.086	0.398804	12941	34719	2.412	9589
Hubei	2012	0.387	0.084	0.390371	14809	39149	2.403	10756
Hubei	2013	0.371	0.078	0.383805	16472	43835	2.339	11761
Hubei	2014	0.482	0.074	0.320207	18283	48635	2.291	12928
Hubei	2015	0.485	0.071	0.314316	20026	52021	2.284	14316
Hubei	2016	0.475	0.071	0.310058	21787	56844	2.309	15889
Hubei	2017	0.4	0.07	0.30101	23757	63169	2.309	16938
Hubei	2018	0.401	0.068	0.28106	25815	71097	2.3	19538
Hubei	2019	0.358	0.066	0.275736	28319	76712	2.294	21567
Hubei	2020	0.395	0.062	0.306436	27881	73687	2.251	19246
Hubei	2021	0.421	0.058	0.305127	30829	86416	2.206	23846
Hunan	2010	0.46	0.129	0.432898	10861	24005	2.842	8308
Hunan	2011	0.372	0.121	0.414892	12612	28766	2.767	9713
Hunan	2012	0.38	0.119	0.408263	14391	32203	2.763	10806
Hunan	2013	0.473	0.112	0.368431	16005	35702	2.697	11946
Hunan	2014	0.362	0.107	0.319107	17622	39181	2.641	13289
Hunan	2015	0.367	0.103	0.317895	19317	43155	2.623	14267
Hunan	2016	0.42	0.1	0.305512	21115	46606	2.622	15750
Hunan	2017	0.485	0.098	0.291581	23103	51030	2.624	17160
Hunan	2018	0.466	0.094	0.279669	25241	54763	2.604	18808
Hunan	2019	0.47	0.091	0.281801	27680	60104	2.588	20479
Hunan	2020	0.469	0.084	0.297733	29380	62900	2.514	20998
Hunan	2021	0.438	0.079	0.295484	31993	69440	2.452	22798
Guangdong	2010	0.472	0.089	0.402877	16579	44669	2.85	12907
Guangdong	2011	0.47	0.081	0.409788	18916	50076	2.701	14459
Guangdong	2012	0.443	0.079	0.409077	21268	52308	2.698	16002
Guangdong	2013	0.492	0.076	0.349999	23421	56029	2.669	17421
Guangdong	2014	0.473	0.073	0.343119	25685	59909	2.625	19205
Guangdong	2015	0.372	0.07	0.345002	27859	64516	2.602	20976
Guangdong	2016	0.374	0.068	0.341818	30296	69671	2.597	23448
Guangdong	2017	0.445	0.067	0.335099	33003	76218	2.597	24820
Guangdong	2018	0.442	0.064	0.325507	35810	81625	2.583	26054
Guangdong	2019	0.463	0.062	0.323135	39014	86956	2.557	28995
Guangdong	2020	0.487	0.056	0.337966	41029	88521	2.495	28492
Guangdong	2021	0.448	0.054	0.331904	44993	98285	2.459	31589
Guangxi	2010	0.461	0.16	0.4434	9739	18070	3.186	6697
Guangxi	2011	0.492	0.147	0.419987	11054	22234	3.058	7816
Guangxi	2012	0.417	0.141	0.411477	12644	24181	3	8910
Guangxi	2013	0.482	0.132	0.390528	14082	26416	2.911	9596
Guangxi	2014	0.395	0.125	0.35819	15557	28603	2.841	10274
Guangxi	2015	0.357	0.119	0.347408	16873	30890	2.79	11401
Guangxi	2016	0.449	0.113	0.344228	18305	33340	2.734	12295
Guangxi	2017	0.411	0.108	0.328513	19905	36441	2.693	13424
Guangxi	2018	0.416	0.101	0.304373	21485	39837	2.608	14935
Guangxi	2019	0.414	0.094	0.306436	23328	42778	2.541	16418
Guangxi	2020	0.433	0.084	0.341846	24562	44237	2.42	16357
Guangxi	2021	0.422	0.079	0.32205	26727	49206	2.355	18088
Hainan	2010	0.423	0.112	0.474323	10342	23323	2.736	7517
Hainan	2011	0.405	0.105	0.483317	12392	28014	2.64	8859
Hainan	2012	0.484	0.102	0.480956	14180	30993	2.616	10161
Hainan	2013	0.398	0.096	0.399272	15733	34053	2.546	11193
Hainan	2014	0.381	0.089	0.394127	17476	37166	2.47	12471
Hainan	2015	0.448	0.084	0.395149	18979	39704	2.427	13575
Hainan	2016	0.439	0.08	0.402473	20653	43009	2.403	14275
Hainan	2017	0.392	0.077	0.38538	22553	46631	2.389	15403
Hainan	2018	0.354	0.076	0.373802	24579	50263	2.384	17528
Hainan	2019	0.367	0.075	0.36422	26679	53929	2.383	19555
Hainan	2020	0.358	0.067	0.396067	27904	55131	2.279	18972
Hainan	2021	0.409	0.063	0.368997	30457	63707	2.225	22242
Chongqing	2010	0.46	0.124	0.376383	10984	28084	2.981	8810
Chongqing	2011	0.362	0.109	0.376505	13037	34864	2.803	10263
Chongqing	2012	0.457	0.105	0.376539	14924	39178	2.791	11468
Chongqing	2013	0.387	0.097	0.419931	16569	43528	2.715	12600
Chongqing	2014	0.433	0.091	0.360008	18352	48307	2.65	13811
Chongqing	2015	0.462	0.085	0.351761	20110	52476	2.593	15140
Chongqing	2016	0.477	0.08	0.342486	22034	58327	2.564	16385
Chongqing	2017	0.41	0.076	0.332074	24153	64176	2.547	17898
Chongqing	2018	0.393	0.072	0.323182	26386	68464	2.532	19248
Chongqing	2019	0.403	0.068	0.320916	28920	74337	2.507	20774
Chongqing	2020	0.386	0.063	0.336033	30824	78173	2.445	21678
Chongqing	2021	0.426	0.059	0.331513	33803	86879	2.403	24598
Sichuan	2010	0.461	0.132	0.447587	9373	21230	2.845	7490
Sichuan	2011	0.37	0.121	0.439214	11130	26136	2.734	8751
Sichuan	2012	0.497	0.118	0.440538	12753	29627	2.715	9837
Sichuan	2013	0.383	0.112	0.368576	14231	32750	2.652	11055
Sichuan	2014	0.474	0.106	0.367731	15749	35563	2.592	12368
Sichuan	2015	0.39	0.101	0.366884	17221	37150	2.557	13632
Sichuan	2016	0.431	0.097	0.358609	18808	40297	2.529	14839
Sichuan	2017	0.363	0.094	0.3481	20580	45835	2.513	16180
Sichuan	2018	0.414	0.09	0.336166	22461	51658	2.492	17664
Sichuan	2019	0.46	0.086	0.334404	24703	55619	2.464	19338
Sichuan	2020	0.391	0.08	0.355167	26522	58009	2.401	19783
Sichuan	2021	0.427	0.076	0.350823	29080	64326	2.358	21518
Guizhou	2010	0.472	0.21	0.441366	7226	12882	3.735	5507
Guizhou	2011	0.444	0.202	0.450718	8594	16024	3.648	6452
Guizhou	2012	0.456	0.197	0.428214	9850	18947	3.607	7247
Guizhou	2013	0.461	0.186	0.403101	11083	22089	3.487	8288
Guizhou	2014	0.361	0.174	0.338793	12371	25101	3.38	9303
Guizhou	2015	0.43	0.166	0.324163	13697	28547	3.327	10414
Guizhou	2016	0.369	0.16	0.310843	15121	31589	3.306	11932
Guizhou	2017	0.439	0.154	0.304865	16704	35988	3.279	12970
Guizhou	2018	0.367	0.149	0.274889	18430	40271	3.252	13798
Guizhou	2019	0.421	0.141	0.278091	20397	43727	3.199	14780
Guizhou	2020	0.5	0.131	0.309733	21795	46355	3.1	14874
Guizhou	2021	0.411	0.126	0.309273	23996	50808	3.05	17957
Yunnan	2010	0.353	0.197	0.452314	8184	16866	3.589	6204
Yunnan	2011	0.479	0.186	0.442134	9739	20653	3.473	7135
Yunnan	2012	0.445	0.181	0.43223	11233	23992	3.435	8192
Yunnan	2013	0.42	0.172	0.416847	12578	27665	3.34	8824
Yunnan	2014	0.444	0.164	0.325395	13772	30217	3.259	9870
Yunnan	2015	0.467	0.157	0.325993	15223	32117	3.2	11005
Yunnan	2016	0.465	0.152	0.317994	16720	35051	3.172	11769
Yunnan	2017	0.384	0.147	0.303238	18348	39458	3.143	12658
Yunnan	2018	0.36	0.143	0.279538	20084	44446	3.11	14250
Yunnan	2019	0.421	0.136	0.288875	22082	49323	3.045	15780
Yunnan	2020	0.415	0.125	0.303239	23295	52047	2.92	16792
Yunnan	2021	0.434	0.121	0.31637	25666	57686	2.881	18851
Tibet	2010	0.406	0.203	0.497865	6628	17209	3.701	4809
Tibet	2011	0.492	0.174	0.503681	7510	20083	3.376	5063
Tibet	2012	0.473	0.161	0.526635	8568	22762	3.223	5468
Tibet	2013	0.472	0.153	0.52787	9740	26209	3.112	6307
Tibet	2014	0.404	0.144	0.460603	10730	29275	2.992	7317
Tibet	2015	0.49	0.155	0.475378	12254	31847	3.088	8246
Tibet	2016	0.462	0.153	0.48616	13639	35015	3.057	9319
Tibet	2017	0.497	0.146	0.464007	15457	39158	2.969	10320
Tibet	2018	0.501	0.144	0.3759	17286	44051	2.952	11520
Tibet	2019	0.467	0.138	0.36783	19501	47491	2.889	13029
Tibet	2020	0.44	0.132	0.36194	21744	52280	2.819	13225
Tibet	2021	0.481	0.125	0.355868	24950	56831	2.746	15343
Shaanxi	2010	0.382	0.168	0.355518	9412	26388	3.427	7625
Shaanxi	2011	0.414	0.153	0.331256	11229	32467	3.252	9026
Shaanxi	2012	0.416	0.146	0.329429	12885	37453	3.225	10175
Shaanxi	2013	0.39	0.138	0.341963	14372	41906	3.151	11217
Shaanxi	2014	0.452	0.13	0.279025	15837	45610	3.072	12204
Shaanxi	2015	0.363	0.124	0.278624	17395	46654	3.041	13087
Shaanxi	2016	0.368	0.12	0.276641	18874	49341	3.027	13943
Shaanxi	2017	0.429	0.115	0.276787	20635	55216	3.001	14900
Shaanxi	2018	0.394	0.11	0.265631	22528	61115	2.971	16160
Shaanxi	2019	0.433	0.104	0.267504	24666	65506	2.929	17465
Shaanxi	2020	0.423	0.096	0.276705	26226	66292	2.844	17418
Shaanxi	2021	0.417	0.09	0.275585	28568	75360	2.761	19347
Gansu	2010	0.397	0.204	0.389915	7358	15421	3.688	5846
Gansu	2011	0.504	0.201	0.371148	8463	18846	3.672	6920
Gansu	2012	0.395	0.197	0.347758	9768	21141	3.646	7937
Gansu	2013	0.475	0.187	0.330815	10954	23647	3.556	8943
Gansu	2014	0.438	0.178	0.325906	12185	25724	3.474	9875
Gansu	2015	0.481	0.171	0.314828	13467	25946	3.427	10951
Gansu	2016	0.416	0.169	0.302034	14670	27396	3.445	12254
Gansu	2017	0.389	0.164	0.296257	16011	29102	3.438	13120
Gansu	2018	0.435	0.158	0.290844	17488	32178	3.403	14624
Gansu	2019	0.367	0.153	0.288053	19139	34707	3.357	15879
Gansu	2020	0.485	0.144	0.294827	20335	35848	3.27	16175
Gansu	2021	0.437	0.135	0.298902	22066	41046	3.165	17456
Qinghai	2010	0.359	0.181	0.395105	8659	20418	3.59	7713
Qinghai	2011	0.508	0.164	0.383287	10024	24233	3.389	9032
Qinghai	2012	0.454	0.154	0.362427	11470	26839	3.278	10386
Qinghai	2013	0.356	0.142	0.313394	12948	30005	3.149	11576
Qinghai	2014	0.391	0.133	0.305787	14374	32218	3.063	12605
Qinghai	2015	0.474	0.134	0.2908	15813	34883	3.094	13611
Qinghai	2016	0.408	0.13	0.289133	17302	38968	3.088	14775
Qinghai	2017	0.438	0.125	0.287233	19001	42211	3.083	15503
Qinghai	2018	0.43	0.118	0.282147	20757	46854	3.032	16557
Qinghai	2019	0.468	0.11	0.292448	22618	49976	2.942	17545
Qinghai	2020	0.387	0.104	0.285736	24037	50845	2.877	18284
Qinghai	2021	0.43	0.096	0.30758	25920	56398	2.775	19020
Ningxia	2010	0.437	0.13	0.359415	9864	24984	2.945	7745
Ningxia	2011	0.488	0.125	0.360461	11480	30161	2.915	9010
Ningxia	2012	0.438	0.121	0.34606	13104	32609	2.879	10009
Ningxia	2013	0.444	0.114	0.285704	14566	35135	2.826	11292
Ningxia	2014	0.391	0.107	0.284803	15907	36815	2.769	12485
Ningxia	2015	0.392	0.103	0.267433	17329	37876	2.762	13816
Ningxia	2016	0.468	0.099	0.247322	18832	40339	2.756	14965
Ningxia	2017	0.464	0.094	0.24732	20562	45718	2.745	15350
Ningxia	2018	0.425	0.091	0.253309	22400	49614	2.724	16715
Ningxia	2019	0.43	0.085	0.251696	24412	52537	2.67	18297
Ningxia	2020	0.475	0.077	0.275128	25735	55021	2.572	17506
Ningxia	2021	0.44	0.071	0.272001	27905	62549	2.497	20024
Xinjiang	2010	0.492	0.134	0.385649	9042	24700	2.9	7126
Xinjiang	2011	0.461	0.126	0.370967	10443	29624	2.813	8575
Xinjiang	2012	0.374	0.122	0.368128	12151	33103	2.766	10171
Xinjiang	2013	0.484	0.115	0.343777	13670	36988	2.688	11392
Xinjiang	2014	0.491	0.111	0.323846	15097	40193	2.661	11904
Xinjiang	2015	0.389	0.118	0.318071	16859	39520	2.788	12867
Xinjiang	2016	0.35	0.116	0.299537	18355	40020	2.795	14066
Xinjiang	2017	0.505	0.113	0.287559	19975	45476	2.786	15087
Xinjiang	2018	0.492	0.106	0.289798	21500	51238	2.736	16189
Xinjiang	2019	0.482	0.097	0.28987	23103	53542	2.642	17397
Xinjiang	2020	0.5	0.085	0.31649	23845	53606	2.479	16512
Xinjiang	2021	0.446	0.08	0.302696	26075	61725	2.417	18961

## Sheet: Rural Revitalization
		Industry prosperity				Pleasant living environments					Social etiquette and civility				Effective governance			Prosperity
Province	YEAR	per capita primary industry output (100 million yuan)	grain yield (kilograms per hectare)	agricultural mechanization (kilowatts per hectare)	Effective irrigation rate area (thousands hectares)	forest area ratio (%)	domestic waste harmless treatment rate (%)	number of public toilets (units)	number of rural doctors and health workers (ten thousand individuals)	comprehensive water supply capacity (10,000 per day)	local government educational expenditure (hundred million yuan)	illiterate population rate (percentage of the population aged 15 and older)	distribution of village cultural centers (units per 10,000 individuals)	television penetration rate (%)	urban–rural income disparity	urban–rural consumption expenditure gap	number of village committees (units per 10,000 individuals)	per capita disposable income of rural residents (yuan)	rural Engel coefficient (%)	employment rate
Beijing	2010	0.0625924	10002.6	276	211.42	35.84	97	5966	0.37	1604.1	450.22	0.0176176	0.653452	99.99	0.384912	0.385933	14.3179	12368	26.5567	0.17734
Beijing	2011	0.0664526	11056.7	265.2	209.33	35.84	98.24	5843	0.37	1588.27	520.08	0.0172841	0.640865	100	0.377891	0.418861	14.1098	13742	26.1108	0.185171
Beijing	2012	0.0714148	11351.2	241.1	207.54	35.84	99.12	5773	0.37	1644.19	628.65	0.0146345	0.638843	100	0.381209	0.410653	13.8299	15365	26.8926	0.196005
Beijing	2013	0.0752	11479.8	207.72	153.02	35.84	99.3	5563	0.35	2554.53	681.18	0.0152016	0.632758	100	0.38374	0.428806	13.6164	17101	27.9121	0.164517
Beijing	2014	0.0733303	10532.1	195.76	143.11	43.77	99.59	5429	0.34	2439.77	742.05	0.0147935	0.624403	100	0.388754	0.431088	13.4332	18867	27.85	0.161526
Beijing	2015	0.0641682	11509.3	186.05	137.35	43.77	78.75	5401	0.34	2496.71	855.67	0.0171913	0.625881	100	0.38913	0.431499	13.5355	20569	27.7	0.160597
Beijing	2016	0.0591344	11715.7	144.45	128.47	43.77	99.84	5398	0.34	2452.45	887.37	0.0155941	0.626247	100	0.389524	0.452975	13.5607	22310	26.9	0.151573
Beijing	2017	0.0555606	11748.7	133.51	115.48	43.77	99.88	5275	0.32	2178.74	964.62	0.0122966	0.634677	100	0.388424	0.466217	13.67	24240	24.7	0.143012
Beijing	2018	0.0550182	11603.6	125.65	109.67	43.77	100	5270	0.3	3198.87	1025.51	0.0169374	0.643132	100	0.389616	0.470461	13.8344	26490	23.8	0.136189
Beijing	2019	0.0522283	11772.7	122.84	109.24	43.77	99.98	6034	0.28	1942.56	1137.18	0.0172818	0.656945	100	0.391718	0.472001	14.0449	28928	25.3	0.132147
Beijing	2020	0.0494655	11772.7	120.22	109.35	43.77	100	6177	0.27	1788.16	1138.29	0.0172818	0.664147	100	0.398482	0.501198	14.2626	30126	28.5	0.136646
Beijing	2021	0.0508634	11772.7	122.3	109.35	43.77	100	6177	0.27	1788.16	1138.29	0.0172818	0.646883	100	0.408534	0.50398	13.8294	33302.7	28.3	0.139719
Tianjin	2010	0.101363	10156.1	587.79	344.61	9.87	100	1237	0.43	405.18	229.56	0.0203297	0.500565	100	0.44789	0.356862	14.4072	9764	41.7448	0.0350019
Tianjin	2011	0.10522	10313.3	583.87	338	9.87	100	1231	0.48	429.44	302.32	0.0242653	0.510612	100	0.494288	0.437077	14.4191	11941	35.3282	0.0310559
Tianjin	2012	0.107329	10065.6	568.13	337.04	9.87	99.81	1192	0.48	439.54	378.75	0.0223866	0.523128	100	0.511284	0.498444	14.8757	13593	36.2243	0.034967
Tianjin	2013	0.109787	10561.5	554.18	308.87	9.87	96.8	1193	0.46	453.54	461.36	0.0205746	0.540627	100	0.529779	0.559984	14.8452	15353	34.857	0.0398462
Tianjin	2014	0.111127	10366.3	552.33	308.87	12.07	96.67	1206	0.52	447.15	517.01	0.0235452	0.533365	100	0.540024	0.565624	14.83	17014	31.4	0.0464389
Tianjin	2015	0.112787	10614.3	546.92	308.87	12.07	92.74	1327	0.52	456.55	507.44	0.0208724	0.543919	100	0.541978	0.561914	14.9618	18482	29.5	0.0558126
Tianjin	2016	0.116771	11045.4	470	306.62	12.07	94.16	1358	0.51	454.55	502.49	0.0225396	0.546788	100	0.540986	0.561369	15.2479	20076	31.3	0.0660287
Tianjin	2017	0.119858	11914.3	464.65	306.62	12.07	94.43	1475	0.5	468.3	434.59	0.0191442	0.569801	100	0.540096	0.541078	15.8853	21754	29.6	0.0830096
Tianjin	2018	0.126753	11527.7	347.98	304.66	12.07	94.48	1384	0.46	473.9	448.19	0.0138502	0.59017	100	0.536695	0.516399	16.0202	23065	29.6	0.097761
Tianjin	2019	0.13387	12815.4	359.84	304.8	12.07	100	1510	0.41	476.9	467.63	0.0172318	0.602825	100	0.537826	0.512568	16.2441	24804	30.8199	0.0947955
Tianjin	2020	0.151669	12815.4	365.08	299.12	12.07	100	4269	0.35	480.7	442.91	0.0172318	0.607946	100	0.539059	0.545201	16.5229	25691	33.37	0.0970828
Tianjin	2021	0.164173	12815.4	366.8	299.12	12.07	100	4269	0.35	480.7	442.91	0.0172318	0.61657	100	0.542957	0.534715	16.7823	27954.5	33.11	0.0992293
Hebei	2010	0.343792	9777.45	10151.3	4548.01	23.41	69.8	6478	8.46	888.89	514.3	0.0334057	0.485376	99.26	0.375664	0.408336	12.2649	6014	35.15	0.0419557
Hebei	2011	0.373728	10373.7	10349.2	4596.61	23.41	72.56	6629	8.56	995.83	652.11	0.0368641	0.500136	99.26	0.399145	0.444706	12.4447	7187	33.53	0.0474138
Hebei	2012	0.401267	10620.7	10553.8	4603.07	23.41	81.39	6661	8.48	974.18	865.54	0.0376591	0.510326	99.26	0.403422	0.469095	12.5637	8158	33.9	0.047505
Hebei	2013	0.431106	11017.2	10762.7	4349.03	23.41	83.28	6540	8.38	887.82	837.63	0.0312192	0.522926	99.27	0.413371	0.492786	12.8519	9188	32	0.0185651
Hebei	2014	0.432159	10971	10942.9	4404.22	26.78	86.61	6391	8.35	809.04	868.87	0.0313981	0.534197	99.27	0.421938	0.50901	13.1152	10186	29.4	0.063114
Hebei	2015	0.422124	11024.5	11102.8	4447.98	26.78	96.01	6298	8.24	855.56	1041.16	0.0386066	0.55918	99.27	0.422568	0.513049	13.717	11051	28.6	0.0802092
Hebei	2016	0.417966	11421.8	7401.97	4457.64	26.78	97.8	5546	8.23	814.64	1134.9	0.0409842	0.584347	99.28	0.421926	0.512823	14.3618	11919	28	0.104289
Hebei	2017	0.422459	11756.7	7580.58	4474.67	26.78	99.78	5450	7.97	885.9	1276.55	0.0348294	0.606242	99.29	0.421664	0.511456	14.8422	12881	26.7	0.125234
Hebei	2018	0.449583	11528	7706.2	4492.33	26.78	99.8	6044	7.27	968.99	1385.59	0.0395118	0.627708	99.29	0.425478	0.514439	15.3768	14031	26.4	0.147153
Hebei	2019	0.472464	11780.7	7830.72	4482.16	26.78	99.43	5884	6.57	889.1	1537.09	0.0253737	0.646821	99.68	0.430158	0.526849	15.8637	15373	26.6569	0.170786
Hebei	2020	0.519887	12119.5	7965.74	4470.03	26.78	100	6611	6.18	831.63	1596.26	0.0277506	0.667716	99.83	0.44164	0.545776	16.347	16467	29.16	0.175948
Hebei	2021	0.541131	12524.4	7966.84	4787.08	26.78	100	6611	6.18	831.63	1596.26	0.0300857	0.685833	99.83	0.45686	0.636177	16.83	18178.9	30.6	0.181177
Shanxi	2010	0.142805	6665.75	2809.17	1274.15	18.03	73.6	3215	4.51	356.01	328.58	0.0291054	0.644675	97.54	0.339329	0.397616	15.1447	5263	37.5	0.0366016
Shanxi	2011	0.164683	7193.91	2927.3	1319.85	18.03	77.5	3176	4.34	422.39	421.79	0.0289855	0.669283	97.7	0.346507	0.429354	15.7173	6225	37.7135	0.0415157
Shanxi	2012	0.180947	7770.62	3056.09	1319.06	18.03	80.25	3206	4.16	442.48	558.03	0.0233108	0.692462	98.1	0.34915	0.48445	16.285	7064	33.42	0.0471986
Shanxi	2013	0.197341	7746.47	3183.3	1382.79	18.03	87.9	3370	4.09	434.63	542.44	0.020953	0.718021	98.45	0.35713	0.469229	16.9737	7949	33	0.0609237
Shanxi	2014	0.208787	8158.09	3286.2	1408.17	20.5	92.07	3234	3.94	453.65	507.28	0.0289437	0.742418	98.95	0.365989	0.477694	17.4112	8809	29.4	0.0723066
Shanxi	2015	0.206365	8023.19	3351.65	1460.28	20.5	97.17	3261	3.85	460.07	602.85	0.0298374	0.770157	99.31	0.366037	0.469119	18.0865	9454	29	0.0787222
Shanxi	2016	0.206118	8350.64	1744.26	1487.29	20.5	94.6	3550	3.86	494.4	606.97	0.0252265	0.796521	99.41	0.368602	0.472489	18.7182	10082	28.3	0.0794323
Shanxi	2017	0.2049	8394.96	1376.3	1511.21	20.5	94.86	2380	3.79	457.44	620.67	0.0178024	0.822847	99.55	0.370314	0.457727	19.1821	10788	27.4	0.0736366
Shanxi	2018	0.211536	8519.25	1441.09	1518.68	20.5	99.83	2459	3.56	456	668.03	0.0247201	0.85061	99.57	0.378605	0.463466	18.9346	11750	27.7	0.0759361
Shanxi	2019	0.236014	8514.2	1517.57	1519.34	20.5	100	2634	3.4	411.66	696.28	0.0199976	0.883511	99.59	0.38789	0.459757	19.1669	12902	28.2818	0.0817617
Shanxi	2020	0.334232	9133.7	1595.26	1517.38	20.5	100	3015	3.14	420.87	733.36	0.0199976	0.912949	99.65	0.398873	0.506099	19.6162	13878	31.56	0.0846274
Shanxi	2021	0.36979	9558.53	1596.23	1787.44	20.5	100	3015	3.14	420.87	733.36	0.0199976	0.904178	99.65	0.408951	0.519456	20.0553	15308.3	30.89	0.0869456
Nei Mongol	2010	0.444062	4009.99	3033.58	3027.5	21.03	82.8	3962	1.96	341.58	322.11	0.0469924	0.682653	95.38	0.320222	0.398256	10.2271	5780	37.55	0.0221612
Nei Mongol	2011	0.530243	4304.06	3172.7	3072.39	21.03	83.47	4295	2.01	357.38	390.69	0.0437087	0.775603	96.19	0.333542	0.433413	10.7077	6942	37.5297	0.0269341
Nei Mongol	2012	0.589773	4473.86	3280.56	3125.24	21.03	91.22	4459	1.93	378.7	439.97	0.0401185	0.819888	96.84	0.336962	0.45009	10.9592	7956	37.3	0.048266
Nei Mongol	2013	0.644766	4910.35	3430.57	2957.76	21.03	93.55	4291	1.95	378.06	456.87	0.0426836	0.868798	97.64	0.345524	0.471835	11.3268	8985	35.5444	0.0557065
Nei Mongol	2014	0.668844	4871.57	3632.55	3011.88	22.1	96.07	4075	1.84	425.47	477.77	0.0465611	0.898686	98.57	0.351887	0.477472	11.7091	9976	30.5	0.0530842
Nei Mongol	2015	0.668115	5003.95	3805.11	3086.9	22.1	97.72	4171	1.83	410.19	536.53	0.0547254	0.941622	99.1	0.352226	0.486241	12.0108	10776	29.4	0.0596541
Nei Mongol	2016	0.677586	4796.54	3331.09	3131.53	22.1	98.87	4163	1.79	422.79	554.97	0.0466063	1.00271	99.19	0.352055	0.504001	12.4251	11609	29.3	0.0603984
Nei Mongol	2017	0.678093	4799.56	3483.55	3174.83	22.1	99.41	6448	1.81	427.31	561.85	0.0482108	1.04147	99.22	0.352789	0.515441	12.8332	12584	27.8	0.0532115
Nei Mongol	2018	0.722832	5233.23	3663.66	3196.52	22.1	99.79	7612	1.76	421.13	576.33	0.0457748	1.05106	99.22	0.360345	0.518108	13.2364	13803	27.5	0.0920453
Nei Mongol	2019	0.771536	5349.8	3866.42	3199.19	22.1	99.81	7233	1.64	410.83	609.97	0.0415235	1.07779	99.22	0.374749	0.544301	13.636	15283	27.276	0.136002
Nei Mongol	2020	0.844357	5449.8	4056.58	3199.12	22.1	99.92	7237	1.56	401.83	642.17	0.0478714	1.11596	99.68	0.400624	0.569072	14.121	16567	30.6	0.14098
Nei Mongol	2021	0.927179	5778.3	4174	3443.5	22.1	99.92	7237	1.56	401.83	642.17	0.0492109	1.13899	99.68	0.413206	0.577013	14.4503	18336.8	30.1	0.144385
Liaoning	2010	0.335749	5562.86	2248.66	1537.54	38.24	70.9	6322	2.68	1391.14	405.39	0.0223837	0.579011	98.59	0.360848	0.30993	6.73462	6671	38.2	0.0641315
Liaoning	2011	0.386709	6435.48	2399.89	1588.38	38.24	80.45	5863	2.7	1354.63	544.09	0.022806	0.610449	98.64	0.375012	0.335142	7.34191	8011	39.1	0.0670033
Liaoning	2012	0.427269	6474.28	2526.89	1698.82	38.24	87.16	5582	2.71	1339.1	728.79	0.022426	0.639469	98.68	0.373834	0.331384	7.59644	9061	38.4	0.0644127
Liaoning	2013	0.452096	6896.33	2631.98	1407.84	38.24	87.61	5500	2.56	1320.17	669.48	0.0179314	0.652118	98.72	0.380605	0.364013	7.92715	10161	32.9	0.0867214
Liaoning	2014	0.459385	5382.26	2730.22	1473.97	39.24	91.59	5353	2.46	1338.06	604.49	0.0178055	0.66506	98.96	0.384808	0.380166	8.04897	11191	28.3	0.103596
Liaoning	2015	0.473421	6065.08	2813.86	1520.31	39.24	95.23	5056	2.46	1289.32	610.24	0.0191476	0.689038	99.07	0.387361	0.411606	8.3471	12057	28.2	0.151033
Liaoning	2016	0.425514	6587.83	2168.45	1572.99	39.24	93.27	5393	2.51	1238.25	633.96	0.0168762	0.706756	99.13	0.391806	0.398184	8.57832	12881	26.9	0.126488
Liaoning	2017	0.441164	6721.71	2215.14	1610.55	39.24	99.05	4172	2.4	1110.65	648.06	0.0154084	0.722109	99.15	0.39285	0.425036	8.81582	13747	26.7	0.140621
Liaoning	2018	0.470893	6292.84	2243.72	1619.33	39.24	99.57	4138	2.19	1198.8	653.88	0.0155374	0.744432	99.17	0.39248	0.433114	9.07894	14656	26.7	0.157937
Liaoning	2019	0.509228	6965.2	2353.89	1629.17	39.24	99.42	4710	1.98	1286.62	702.38	0.0129472	0.771511	99.27	0.404958	0.439773	9.37426	16108	26.5509	0.182231
Liaoning	2020	0.536902	7001.23	2471.26	1632.54	39.24	99.53	4664	1.79	1222.24	741.15	0.0129472	0.782832	99.41	0.432187	0.495432	9.73563	17450	29.73	0.189288
Liaoning	2021	0.582114	7332.88	2488.22	1778.2	39.24	99.53	4664	1.79	1222.24	741.15	0.0129472	0.802699	99.41	0.44637	0.513598	10.0368	19216.6	29.96	0.195144
Jilin	2010	0.338018	5967.2	2145	1726.8	40.38	44.5	4837	1.52	735.5	250.2	0.021614	0.48779	98.59	0.429636	0.361831	7.01559	6341	36.7	0.0317805
Jilin	2011	0.405835	6780.34	2355.04	1807.52	40.38	49.21	4378	1.94	758.57	319.82	0.0223404	0.495334	98.64	0.447926	0.415534	7.2229	7634	35.3	0.0464779
Jilin	2012	0.443143	7053.84	2554.65	1851.87	40.38	45.79	4184	1.91	747.49	451.05	0.0184716	0.510391	98.69	0.451685	0.431366	7.42676	8741	36.7	0.0546428
Jilin	2013	0.468591	7332.95	2730.04	1510.13	40.38	60.85	3959	1.93	730.82	422.09	0.0227568	0.530122	98.71	0.458535	0.471928	8.26516	9781	33	0.0666633
Jilin	2014	0.480772	7021.87	2919.09	1628.43	41.49	61.91	3729	1.9	680.18	407.1	0.028838	0.548603	98.75	0.464295	0.47447	8.16157	10780	29.6	0.0710818
Jilin	2015	0.486261	7181.12	3152.54	1790.87	41.49	84.7	3643	1.75	653.46	477.57	0.0261428	0.565559	98.76	0.454841	0.488677	8.42646	11326	29	0.0829185
Jilin	2016	0.440242	7489.01	3105.27	1832.17	41.49	86.3	3586	1.72	631.02	499.7	0.0247468	0.591185	98.77	0.456954	0.496765	8.80828	12123	28.6	0.110946
Jilin	2017	0.43365	7492.83	3284.65	1893.05	41.49	71.78	3417	1.61	622.86	508.09	0.0349903	0.615094	98.86	0.45729	0.512643	9.16451	12950	28.2	0.20417
Jilin	2018	0.467271	6487.36	3466	1893.05	41.49	87.23	3828	1.48	616.18	513.82	0.0280234	0.640624	99.1	0.455654	0.483433	9.58879	13748	27.8	0.239684
Jilin	2019	0.525866	6869.8	3653.74	1909.5	41.49	90.24	4427	1.36	627.85	500.53	0.022464	0.66326	99.41	0.462429	0.489741	9.96274	14936	28.1455	0.293485
Jilin	2020	0.647308	7004.3	3896.95	1905.44	41.49	100	4319	1.37	655.63	526.69	0.022464	0.695041	99.5	0.481106	0.548675	10.4089	16067	31.4	0.307547
Jilin	2021	0.654248	7446.4	4044.65	2004.6	41.49	100	4319	1.37	655.63	526.69	0.022464	0.715927	99.5	0.494917	0.549161	10.7481	17641.7	30.2	0.316789
Heilongjiang	2010	0.33699	4526.17	3736.29	3875.22	43.16	40.4	8893	2.53	830.22	299.14	0.0147927	0.529511	98.76	0.409742	0.391238	5.32865	6040	33.8	0.0336475
Heilongjiang	2011	0.448308	4841.89	4097.84	4332.65	43.16	43.69	7276	2.63	855.53	373.83	0.0261829	0.54693	98.77	0.442062	0.421187	5.46443	7382	35.1	0.0452372
Heilongjiang	2012	0.569173	4994.31	4552.93	4776.48	43.16	47.58	7058	2.54	891.03	544.79	0.0244024	0.560472	98.78	0.442839	0.419155	5.59724	8367	37.9	0.0450744
Heilongjiang	2013	0.692744	5196.92	4849.28	5342.12	43.16	54.41	6455	2.51	798.05	501.28	0.0218242	0.58508	98.8	0.449396	0.457972	5.7897	9369	35.2	0.0529628
Heilongjiang	2014	0.745843	5300.48	5155.52	5305.2	43.78	58.86	7064	2.44	811.14	505.94	0.0273169	0.611687	98.82	0.462338	0.475496	6.05027	10453	28.2	0.0497778
Heilongjiang	2015	0.768546	5332.03	5442.29	5530.84	43.78	78.24	6617	2.38	828.41	549.66	0.0273644	0.645157	98.84	0.458414	0.489214	6.50676	11095	27.5	0.0295267
Heilongjiang	2016	0.794456	5221.96	5634.27	5932.74	43.78	80.62	6133	2.35	806.87	558.87	0.0359609	0.667928	99	0.459745	0.519372	6.71639	11832	27.7	0.0303685
Heilongjiang	2017	0.872404	5235.41	5813.76	6030.97	43.78	82.73	5719	2.17	786.56	573.11	0.0289227	0.69497	98.94	0.461452	0.546134	6.92499	12665	26.5	0.0301849
Heilongjiang	2018	0.902074	5281.07	6084.65	6119.57	43.78	86.94	5788	2.02	760.34	544.38	0.0234113	0.741143	99.07	0.472885	0.542762	7.37606	13804	27.3	0.0305752
Heilongjiang	2019	0.977942	5232.9	6359.08	6177.59	43.78	95.49	5964	1.81	683.28	555.13	0.0258119	0.783244	99.12	0.484149	0.563727	7.78469	14982	26.8089	0.0385718
Heilongjiang	2020	1.08646	5232.9	6775.09	6171.6	43.78	99.87	6048	1.69	667.39	562.42	0.0258119	0.821634	99.86	0.519621	0.605971	8.22001	16168	34.3	0.0407332
Heilongjiang	2021	1.10815	5232.9	6844.08	6171.6	43.78	99.87	6048	1.69	667.39	562.42	0.0258119	0.837538	99.86	0.53169	0.623411	8.36046	17889.3	33.6	0.0414292
Shanghai	2010	0.0497251	11839.8	104.06	201	10.74	81.9	6026	0.13	1465.64	417.28	0.0236743	0.47911	100	0.420513	0.349179	7.06078	13702	37.2	0.0595233
Shanghai	2011	0.0536503	12113.9	105.68	199.61	10.74	61.04	5768	0.1	1150	549.24	0.0240296	0.448253	100	0.424418	0.349234	6.75156	15737	40.1	0.0587489
Shanghai	2012	0.0538975	12135.5	112.73	199.02	10.74	83.59	6340	0.08	1145	648.95	0.022331	0.432428	100	0.424313	0.361813	6.28384	17452	40	0.0592154
Shanghai	2013	0.0537582	12205.8	113.17	184.09	10.74	90.58	6223	0.08	1124	679.54	0.036424	0.428139	100	0.428005	0.401146	6.32389	19208	39.7	0.0614321
Shanghai	2014	0.0535063	12422.2	117.76	184.09	14.04	100	6168	0.08	1137	695.63	0.0314532	0.412926	100	0.433898	0.421238	6.08024	21192	36	0.0637194
Shanghai	2015	0.0510578	12591.7	119.01	188.21	14.04	100	6197	0.09	1137	767.32	0.0312428	0.383074	100	0.438144	0.437179	5.65034	23205	35	0.0633491
Shanghai	2016	0.0463316	12138.4	122.31	189.81	14.04	100	6220	0.08	1152	840.97	0.0310923	0.397981	100	0.442349	0.428306	5.85916	25520	33.6	0.0662196
Shanghai	2017	0.0449311	12859.2	121.84	190.75	14.04	100	6221	0.08	1184	874.1	0.022852	0.401801	100	0.444517	0.427619	5.8968	27825	33.8	0.0724729
Shanghai	2018	0.0423434	14431	93.97	190.75	14.04	100	6061	0.07	1250	917.99	0.0237697	0.401442	100	0.446468	0.43388	5.84321	30375	37.2	0.0831506
Shanghai	2019	0.043152	14164.8	98.04	190.75	14.04	100	6225	0.06	1250	995.7	0.0248521	0.400075	100	0.450927	0.465052	5.85156	33195	36.4142	0.0890634
Shanghai	2020	0.0432759	8417.7	102.12	165.05	14.04	100	5676	0.06	1221	1000.59	0.0255621	0.401893	100	0.456729	0.492763	5.85938	34911	39.14	0.0894681
Shanghai	2021	0.0401647	8417.7	107.34	165.05	14.04	100	5676	0.06	1221	1000.59	0.0261538	0.401772	100	0.46732	0.530364	5.83884	38520.7	37.32	0.0894413
Jiangsu	2010	0.30615	11971.6	3937.34	3819.74	15.8	93.6	9475	5.74	2714.73	865.36	0.0486044	0.327843	99.88	0.407085	0.452772	5.09431	9067	38.1	0.0442605
Jiangsu	2011	0.362558	12148.7	4106.11	3817.92	15.8	93.77	10134	5.5	2757.24	1093.22	0.0486206	0.325466	99.88	0.42018	0.479197	5.12641	10744	38.5	0.0520975
Jiangsu	2012	0.399187	12333.2	4214.64	3929.72	15.8	95.93	10035	4.49	2749.84	1350.61	0.0477842	0.322614	99.88	0.421168	0.482234	5.05162	12133	37.4	0.0559797
Jiangsu	2013	0.420837	12346.6	4405.62	3785.27	15.8	97.36	10438	3.98	2902.56	1434.99	0.0378216	0.315374	99.88	0.428083	0.48329	4.9836	13521	36.3	0.0622967
Jiangsu	2014	0.435624	12556	4649.98	3890.53	15.2	98.11	11178	3.78	2961.61	1504.86	0.050662	0.323548	99.88	0.435509	0.503493	5.0796	14958	31.4	0.0594111
Jiangsu	2015	0.475346	12687.2	4825.49	3952.5	15.2	100	11739	3.46	3104.12	1746.22	0.0540347	0.337377	100	0.437334	0.516022	5.35881	16257	31.7	0.0663803
Jiangsu	2016	0.482019	12487.2	4906.55	4054.07	15.2	99.93	12136	3.25	3369.65	1842.94	0.0581498	0.349081	100	0.438484	0.545833	5.55957	17606	29.5	0.0712832
Jiangsu	2017	0.480256	12863.4	4991.41	4131.88	15.2	100	12934	3.09	3445.18	1979.57	0.0595165	0.362299	100	0.439182	0.563082	5.75776	19158	28.9	0.082628
Jiangsu	2018	0.490374	13148.9	5017.71	4179.83	15.2	100	13965	2.7	3491.18	2055.56	0.0576984	0.360417	100	0.441631	0.562318	5.92202	20845	26.2	0.096573
Jiangsu	2019	0.507408	13552.7	5111.95	4205.44	15.2	100	14279	2.48	3472.51	2213.84	0.0474877	0.367142	100	0.44412	0.565482	6.15864	22675	26.2331	0.110409
Jiangsu	2020	0.535265	8017.8	5213.83	4224.73	15.2	100	14961	2.32	3490.41	2406.53	0.0474877	0.37353	100	0.455689	0.551195	6.35801	24198	30.64	0.114333
Jiangsu	2021	0.555252	8017.8	5443.22	4224.73	15.2	100	14961	2.32	3490.41	2406.53	0.0474877	0.378993	100	0.463962	0.577988	6.44198	26790.8	32.09	0.116143
Zhejiang	2010	0.242889	10287.2	2427.46	1450.98	59.07	98.3	7287	1.1	1519.85	606.54	0.0610111	0.564015	99.35	0.458063	0.501315	14.0181	12277	34.2214	0.0870516
Zhejiang	2011	0.275619	10578.4	2461.25	1456.8	59.07	96.43	7673	1.08	1524.58	751.42	0.0625904	0.466567	99.38	0.46793	0.48887	13.7171	14197	37.6	0.101973
Zhejiang	2012	0.283342	10437.6	2489.4	1471.02	59.07	98.97	7852	0.98	1537.79	877.86	0.0511956	0.454336	99.6	0.466998	0.495747	13.6576	15806	37.7	0.107258
Zhejiang	2013	0.297147	10056.9	2462.2	1409.39	59.07	99.44	7962	0.89	1675.5	950.07	0.0538052	0.446371	99.64	0.471791	0.506969	13.5872	17494	35.6	0.096466
Zhejiang	2014	0.293141	10204.7	2420.13	1425.37	59.43	100	8026	0.85	1720.46	1030.99	0.0585411	0.444798	99.65	0.479613	0.532193	13.5654	19373	31.9	0.110453
Zhejiang	2015	0.295973	10235.2	2360.73	1432.15	59.43	99.22	8199	0.82	1794.03	1264.93	0.0586945	0.454421	99.69	0.483255	0.562018	13.8415	21125	31.1	0.128091
Zhejiang	2016	0.311331	9753.02	2136.69	1446.31	59.43	99.98	8145	0.8	1833.52	1300.03	0.0599245	0.488766	99.72	0.48407	0.577325	14.065	22866	31.8	0.143216
Zhejiang	2017	0.313436	10328.7	2072.27	1444.7	59.43	100	7883	0.78	1769.78	1430.15	0.0539801	0.502541	99.75	0.486842	0.566752	14.3141	24956	31	0.151185
Zhejiang	2018	0.314985	10425.8	2009.33	1440.8	59.43	100	8075	0.73	1831.19	1572.47	0.0493188	0.51312	99.8	0.491273	0.569599	13.1396	27302	30.3	0.162492
Zhejiang	2019	0.327325	10176	1908.04	1405.43	59.43	100	7744	0.69	1902.37	1764.69	0.045252	0.524898	99.82	0.496428	0.569265	13.0419	29876	30.5763	0.178189
Zhejiang	2020	0.334904	6447	1813.17	1415.7	59.43	100	8631	0.66	2039.12	1881.09	0.045252	0.52274	99.84	0.509259	0.595491	12.5969	31930	32.25	0.179343
Zhejiang	2021	0.337781	6447	1978.34	1415.7	59.43	100	8631	0.66	2039.12	1881.09	0.045252	0.521241	99.84	0.51466	0.602349	12.21	35247.4	30.98	0.180555
Anhui	2010	0.268706	9210.87	5409.78	3519.78	27.53	64.6	3168	5.57	1992.81	386.31	0.0855311	0.372343	97.5	0.371065	0.48929	4.57946	5776	40.7	0.0198897
Anhui	2011	0.312793	9453.01	5657.08	3547.65	27.53	86.99	3087	5.53	820.17	564.71	0.0843281	0.385556	97.74	0.371273	0.527853	4.51443	6811	41.5	0.0220383
Anhui	2012	0.337671	10139.5	5902.77	3585.09	27.53	91.14	3096	5.32	1029.37	717.94	0.0827325	0.399042	98.1	0.377539	0.519477	4.68944	7826	39.3	0.02041
Anhui	2013	0.362926	10066.8	6140.28	4305.53	27.53	98.82	3122	5.16	1073.97	736.59	0.0742749	0.412617	98.57	0.388345	0.493353	4.78129	8850	39.6	0.0258398
Anhui	2014	0.382691	10743.5	6365.83	4331.69	28.65	99.51	3192	4.83	1074.84	743.07	0.0722862	0.423701	98.72	0.399211	0.495499	4.86401	9916	35.6	0.0198396
Anhui	2015	0.395292	11258.3	6580.99	4400.34	28.65	99.55	3223	4.59	1094.78	856.73	0.0650669	0.437026	98.93	0.40173	0.520773	4.98373	10821	35.8	0.0210234
Anhui	2016	0.412697	10847.3	6867.5	4437.46	28.65	99.94	3417	4.33	1111.57	910.87	0.0680923	0.451295	99.03	0.401976	0.524686	5.10278	11720	34.2	0.023212
Anhui	2017	0.426333	11065.5	6312.86	4504.14	28.65	99.94	3467	4.09	906.28	1014.91	0.0680274	0.464125	99.19	0.403224	0.535487	5.23071	12758	33.5	0.0288661
Anhui	2018	0.434167	10961	6543.81	4538.29	28.65	100	3826	3.76	896.55	1113.26	0.0674948	0.476489	99.83	0.406943	0.592297	5.38685	13996	33	0.037748
Anhui	2019	0.478656	11198.9	6650.47	4580.84	28.65	100	4403	3.5	997.68	1222.21	0.0642857	0.490387	99.87	0.410655	0.611639	5.54244	15416	32.6953	0.058285
Anhui	2020	0.521716	5356.8	6799.5	4608.83	28.65	100	4769	3.09	1079.04	1261.86	0.0642857	0.502388	99.9	0.421378	0.662346	5.70317	16620	34.3	0.0599917
Anhui	2021	0.549745	5356.8	6984.6	4608.83	28.65	100	4769	3.09	1079.04	1261.86	0.0642857	0.514	99.9	0.427162	0.647791	5.84292	18371.7	33.6	0.0614746
Fujian	2010	0.343867	9196.69	1206.16	967.51	65.95	92	2640	2.9	676.42	327.77	0.0415852	0.59774	98.45	0.380285	0.446211	9.10939	7573	46.1	0.0589156
Fujian	2011	0.394345	9469.43	1250.81	967.48	65.95	94.55	2920	2.86	682.94	406.73	0.0441847	0.598062	98.54	0.393114	0.469916	9.10657	8952	46.4	0.0511192
Fujian	2012	0.424082	9536.26	1286.8	968.51	65.95	96.42	2890	2.82	721	562.3	0.0462295	0.605432	98.58	0.396257	0.476511	9.23828	10164	46	0.0561401
Fujian	2013	0.449215	9694.03	1336.76	1122.42	65.95	98.16	3078	2.79	721.94	574.91	0.0506583	0.641531	98.63	0.404806	0.485582	9.48244	11405	38.9	0.0522023
Fujian	2014	0.470444	9827.01	1368.35	1116.12	66.8	97.86	3113	2.72	717.24	634.6	0.0554397	0.640885	98.7	0.411757	0.497928	9.62994	12650	38.2	0.06857
Fujian	2015	0.485141	9879.1	1384.13	1061.65	66.8	99.19	3185	2.69	710.03	757.51	0.0665227	0.656512	98.94	0.414515	0.508546	9.847	13793	37.6	0.0902806
Fujian	2016	0.534138	9911.18	1269.09	1055.37	66.8	98.44	2629	2.65	737.04	789.11	0.0613552	0.67268	99.12	0.416477	0.516316	10.0741	14999	37.3	0.107755
Fujian	2017	0.54492	10109.3	1232.42	1064.84	66.8	99.38	3924	2.53	766.16	842.21	0.0560061	0.692288	99.15	0.418835	0.538992	10.3512	16335	36.9	0.12886
Fujian	2018	0.579678	10331.4	1228.27	1085.18	66.8	99.88	4824	2.33	781.26	925.06	0.0671944	0.710628	99.19	0.423091	0.530929	10.5952	17821	35.7	0.155335
Fujian	2019	0.627394	10421.1	1237.73	1076.78	66.8	99.95	5517	2.12	830.99	968.54	0.0681189	0.720723	99.71	0.428935	0.52611	10.8267	19568	35.5252	0.179745
Fujian	2020	0.656218	6091.7	1260.2	1110.42	66.8	100	6344	1.94	889.99	1031.57	0.0681189	0.734361	99.85	0.442748	0.535933	11.0623	20880	38.4	0.183721
Fujian	2021	0.69208	6091.7	1346.7	1110.42	66.8	100	6344	1.94	889.99	1031.57	0.0681189	0.738575	99.85	0.454217	0.568334	11.3403	23228.9	35.07	0.188325
Jiangxi	2010	0.25718	7879.4	3805	1852.39	60.01	85.9	1785	4.35	459.23	297.5	0.0342146	0.652597	97.96	0.382665	0.443795	6.78397	5991	46.3405	0.0458461
Jiangxi	2011	0.29515	8311.03	4200.03	1867.67	60.01	88.27	2009	4.84	444.77	474.43	0.037026	0.676928	98.18	0.403177	0.477898	6.97817	7133	45.2002	0.0491607
Jiangxi	2012	0.321587	9151.78	4599.68	1907.06	60.01	89.05	2041	4.88	435.9	622.06	0.0373962	0.699571	98.4	0.403435	0.483671	7.20426	8103	43.53	0.0570106
Jiangxi	2013	0.344214	8908.59	2014.13	1995.6	60.01	93.28	1905	4.75	444.51	664.53	0.0275294	0.714608	98.5	0.410895	0.491729	7.41702	9089	42.3	0.0606014
Jiangxi	2014	0.363147	9191.31	2118.39	2001.57	61.16	93.09	1982	4.68	457.66	711.72	0.033827	0.736675	98.55	0.416183	0.498481	7.67866	10117	36.5	0.0656598
Jiangxi	2015	0.382274	9266.34	2260.82	2027.67	61.16	94.46	1887	4.61	473.05	793.27	0.0467696	0.762852	98.64	0.42034	0.507172	7.9216	11139	36.2	0.0701899
Jiangxi	2016	0.399044	9587.24	2201.62	2036.83	61.16	94.97	2077	4.51	494.3	848.88	0.0483399	0.783135	98.83	0.423325	0.515823	8.24032	12138	35.3	0.0676638
Jiangxi	2017	0.40685	9670.68	2309.6	2039.42	61.16	97.56	2242	4.34	550.79	940.57	0.0435843	0.811662	98.89	0.42445	0.512887	8.52345	13242	33.6	0.066299
Jiangxi	2018	0.415976	9805.88	2381.97	2032.02	61.16	100	2581	3.96	602.65	1054.41	0.0412782	0.842488	99.09	0.42757	0.524326	8.8321	14460	31.3	0.0663031
Jiangxi	2019	0.455647	9769.9	2470.66	2036.14	61.16	100	3756	3.73	594.28	1148.5	0.0294686	0.864531	99.14	0.432222	0.550189	9.19336	15796	30.4179	0.0698496
Jiangxi	2020	0.496474	6022	2591.05	2038.49	61.16	100	4331	3.61	646.33	1223.59	0.042236	0.891554	99.51	0.440424	0.613491	9.50226	16981	33.6	0.0722136
Jiangxi	2021	0.516779	6022	2688.5	2038.49	61.16	100	4331	3.61	646.33	1223.59	0.0463768	0.912772	99.51	0.44823	0.637061	9.75788	18684.2	33.3	0.0741649
Shandong	2010	0.355793	12075.9	11629	4955.3	16.73	91.9	5583	12.91	1477.64	770.45	0.067282	0.277438	97.88	0.370776	0.350443	15.1249	7034	37.5366	0.056993
Shandong	2011	0.389922	12325.2	12098.3	4986.88	16.73	92.54	5674	13.59	1616.88	1047.9	0.0662401	0.273509	97.91	0.387259	0.387532	15.0809	8395	35.7096	0.0601868
Shandong	2012	0.416883	12409.5	12419.9	5058.11	16.73	98.06	5745	13.19	1644.45	1311.8	0.0620343	0.277221	98.03	0.388063	0.410711	15.3685	9506	34.3	0.0682381
Shandong	2013	0.457018	12181.6	12739.8	4729.03	16.73	99.47	5733	13.44	1701.9	1399.67	0.0530796	0.273381	98.21	0.397552	0.413132	16.4906	10687	34.5	0.082958
Shandong	2014	0.475408	12157.4	13101.4	4901.95	17.51	100	6084	13.22	1725.23	1461.05	0.0553522	0.27907	98.49	0.406611	0.434536	16.5431	11882	31	0.100826
Shandong	2015	0.496939	12243.6	13353	4964.43	17.51	100	6351	12.87	1776.71	1690.62	0.0664677	0.291614	98.55	0.409891	0.440617	17.3864	12930	30.4	0.126058
Shandong	2016	0.484338	12509.1	9797.61	5161.16	17.51	100	6860	11.83	1807.81	1825.99	0.0655896	0.302014	98.62	0.410267	0.442847	18.2084	13954	29.8	0.157199
Shandong	2017	0.48168	12695.8	10144.1	5191.06	17.51	100	6547	10.97	1860.2	1890	0.0606502	0.308088	98.93	0.410938	0.448249	18.8531	15118	28.6	0.192898
Shandong	2018	0.491267	12642.5	10415.2	5235.99	17.51	100	7086	10.11	1892.12	2006.5	0.0704052	0.312075	99.09	0.412071	0.454472	17.9209	16297	28.1	0.229615
Shandong	2019	0.506332	12883.8	10679.8	5271.37	17.51	99.94	7458	9.08	1924.95	2156.14	0.073344	0.313406	99.1	0.419925	0.460477	17.6475	17775	27.8099	0.31237
Shandong	2020	0.527753	6505	10964.7	5293.56	17.51	100	8028	8.33	1908.07	2283.84	0.073344	0.32137	99.59	0.428875	0.463889	17.9062	18753	29.4	0.320574
Shandong	2021	0.592825	6505	11342.1	5293.56	17.51	100	8028	8.33	1908.07	2283.84	0.073344	0.326398	99.59	0.441799	0.487772	18.2352	20793.9	29.59	0.32831
Henan	2010	0.332477	11094.8	10195.9	5080.96	21.5	82.6	7041	12.88	1010.34	609.37	0.0708618	0.331065	97.39	0.378064	0.37315	8.17912	5846	37.2377	0.0324115
Henan	2011	0.354011	11169	10515.8	5150.44	21.5	84.42	7189	13.22	1037.56	857.14	0.0569712	0.339303	97.77	0.395731	0.384573	8.40659	6989	36.1055	0.0350951
Henan	2012	0.375283	11279.8	10872.7	5205.63	21.5	86.4	7162	12.39	1042.31	1106.51	0.0536301	0.344696	97.94	0.4013	0.402463	8.52517	7963	33.82	0.037365
Henan	2013	0.399791	11241.2	11150	4969.11	21.5	90.04	7089	12.13	1047.26	1171.52	0.0488019	0.353202	98.11	0.412539	0.417011	8.70449	8969	34.445	0.0203402
Henan	2014	0.413499	11185.3	11476.8	5101.15	24.14	92.84	7218	11.93	1083.62	1201.38	0.0454243	0.35925	98.26	0.421004	0.449642	8.85634	9966	29.6	0.0231418
Henan	2015	0.413937	11616.5	11710.1	5210.64	24.14	95.99	7540	11.65	1121.39	1271	0.0524759	0.370068	98.43	0.424343	0.459776	9.13011	10853	29.2	0.02228
Henan	2016	0.415586	11559.6	9854.96	5242.92	24.14	98.75	7932	11.38	1180.32	1343.76	0.0564902	0.378972	98.64	0.429516	0.474735	9.3507	11697	28.5	0.0243137
Henan	2017	0.421131	11900.2	10038.3	5273.63	24.14	99.65	8593	10.95	1150.37	1493.11	0.0500248	0.391813	98.84	0.430307	0.474307	9.50682	12719	27.1	0.0273714
Henan	2018	0.437054	12172.5	10204.5	5288.69	24.14	99.71	9851	10.33	1166.64	1664.67	0.0482897	0.403944	99.04	0.433927	0.495116	9.6902	13831	26.7	0.040214
Henan	2019	0.468205	12430.7	10357	5328.95	24.14	99.65	10675	9.6	1281.52	1810.71	0.0445397	0.418362	99.47	0.443379	0.525487	9.94934	15164	26.2449	0.0721033
Henan	2020	0.53857	5881.3	10463.7	5463.07	24.14	99.94	10890	9.04	1256.52	1882.56	0.0445397	0.427464	99.58	0.46354	0.590991	10.1639	16108	27.84	0.0740998
Henan	2021	0.568736	5881.3	10577.4	5463.07	24.14	99.94	10890	9.04	1256.52	1882.56	0.0445397	0.439354	99.58	0.472662	0.607192	10.4144	17533.3	29.44	0.0762816
Hubei	2010	0.35671	9971.67	3371	2379.78	38.4	61.4	5087	4.15	1326.28	366.57	0.0595811	0.360621	98.11	0.40117	0.458696	8.94195	6375	43.1	0.0395364
Hubei	2011	0.428681	10192.3	3571.23	2455.69	38.4	61.02	5088	4.41	1351.02	488.16	0.058571	0.370481	98.23	0.414673	0.488726	9.2325	7540	39	0.0500491
Hubei	2012	0.462688	10284.8	3842.16	2548.91	38.4	71.51	4702	4.3	1327.98	732.37	0.0586801	0.38021	98.75	0.416137	0.507227	9.45901	8582	37.6	0.0684415
Hubei	2013	0.497361	10560.8	4081.05	2791.41	38.4	85.4	4759	4.29	1336.58	690.63	0.053013	0.389762	98.81	0.427563	0.511934	9.65001	9692	36.8	0.124963
Hubei	2014	0.516094	10581.6	4292.9	2855.32	39.61	90.16	5130	4.23	1354.3	773.35	0.0580213	0.399264	98.89	0.436544	0.520412	9.88372	10849	31.4	0.166778
Hubei	2015	0.531607	10799.2	4468.12	2899.15	39.61	91.51	5475	4.09	1393.78	913.05	0.0596137	0.410783	98.98	0.43784	0.538863	10.0237	11844	30.1	0.167914
Hubei	2016	0.578845	10417.6	4187.75	2905.57	39.61	95.8	5451	4.04	1467.43	1047.37	0.0563502	0.42245	99.15	0.433029	0.545808	10.2799	12725	30.1	0.17553
Hubei	2017	0.59773	10388.6	4335.09	2919.17	39.61	99.89	5173	3.95	1453.05	1101.35	0.056926	0.434841	99.32	0.433127	0.546766	10.5417	13812	28.6	0.194315
Hubei	2018	0.599662	10305.4	4424.61	2931.9	39.61	99.98	5596	3.74	1426.14	1065.64	0.0481329	0.446345	99.58	0.434712	0.58118	10.1368	14978	28.2	0.213002
Hubei	2019	0.642721	10443.1	4515.73	2968.99	39.61	99.98	5828	3.44	1497.33	1147.1	0.0483801	0.455281	99.7	0.435919	0.580123	10.0202	16391	27.164	0.216966
Hubei	2020	0.719464	6798	4626.07	3086.04	39.61	100	6197	3.27	1597.28	1192.02	0.0483801	0.483135	99.82	0.444233	0.632379	10.3996	16306	29.74	0.23024
Hubei	2021	0.7996	6798	4877.32	3086.04	39.61	100	6197	3.27	1597.28	1192.02	0.0483801	0.491987	99.82	0.453327	0.619068	10.4254	18259	31.91	0.234458
Hunan	2010	0.315551	9275.44	4651.54	2739	47.77	79	2896	4.83	979.41	403.1	0.0391937	0.587612	96.43	0.351907	0.40685	11.5061	6063	48.4378	0.0228629
Hunan	2011	0.367725	9379	4935.59	2762.41	47.77	86.35	2937	4.93	985.12	540.83	0.0423439	0.617973	96.82	0.361345	0.431342	11.7462	7082	45.2384	0.0205024
Hunan	2012	0.389666	9632.38	5189.24	2715.78	47.77	95.01	3280	4.76	999.48	807.58	0.0403861	0.617646	97.17	0.361882	0.448485	11.8558	8024	43.9	0.0189949
Hunan	2013	0.392303	9333.78	5433.99	3084.3	47.77	96.03	3312	4.85	991	809.45	0.0311981	0.647491	97.4	0.37077	0.464398	12.1287	9029	38.3834	0.014379
Hunan	2014	0.404024	9528.71	5672.1	3101.7	49.69	99.7	3373	4.8	1031.79	833.27	0.0331323	0.663518	97.51	0.378623	0.492228	12.3107	10060	34.3	0.0158705
Hunan	2015	0.415404	9691.78	5894.06	3113.32	49.69	99.8	3371	4.79	1038.35	928.54	0.0337032	0.687507	97.98	0.381198	0.496949	12.4255	10993	32.9	0.0158821
Hunan	2016	0.440091	9792.32	6097.54	3132.37	49.69	99.89	3573	4.71	1014.24	1032.37	0.0338737	0.713233	98.26	0.381345	0.496265	7.64451	11930	31.7	0.0215055
Hunan	2017	0.452043	9989.43	6254.83	3145.87	49.69	99.75	3576	4.45	1024.2	1115.33	0.0313068	0.700318	99.3	0.381053	0.497949	7.94203	12936	30.5	0.00835532
Hunan	2018	0.464838	10699	6338.57	3164	49.69	99.96	4331	4	1017.91	1186.72	0.0311848	0.711532	99.64	0.384026	0.507541	8.20236	14093	29.2	0.0634578
Hunan	2019	0.549282	10679.6	6471.82	3176.11	49.69	99.98	4022	3.64	1081.74	1270.02	0.0271312	0.72275	99.72	0.386401	0.518831	8.41958	15395	28.8134	0.0143665
Hunan	2020	0.638155	6644.9	6588.95	3192.9	49.69	100	4380	3.37	1154.79	1325.25	0.0271312	0.69187	99.74	0.397741	0.558815	8.6626	16585	30.96	0.0148117
Hunan	2021	0.652812	6644.9	6687.43	3192.9	49.69	100	4380	3.37	1154.79	1325.25	0.0271312	0.697901	99.74	0.407773	0.599096	8.88981	18295.2	31	0.0152136
Guangdong	2010	0.210671	9818.29	2345.28	1872.46	51.26	72.1	9067	3.42	3497.41	921.48	0.0334597	0.335587	98	0.350834	0.356656	5.52401	7484	47.7	0.0519012
Guangdong	2011	0.237374	10021.9	2414.82	1873.16	51.26	72.12	9558	3.52	3506.32	1227.87	0.0304772	0.328723	98	0.370221	0.397101	5.2935	8889	49.1	0.0482461
Guangdong	2012	0.245567	10260.6	2496.68	1874.44	51.26	79.11	9648	3.47	3531.36	1501.22	0.0278796	0.324789	99.43	0.370594	0.398206	5.28816	9999	49.1	0.0484399
Guangdong	2013	0.255226	9793.73	2564.89	1770.76	51.26	84.62	9631	3.33	3496.53	1744.59	0.0280214	0.326172	99.9	0.374716	0.413394	5.35473	11068	49	0.0542536
Guangdong	2014	0.264488	10131.6	2632.37	1770.99	53.52	86.38	9666	2.85	3555.4	1808.97	0.0307334	0.325359	99.9	0.380926	0.425335	5.36634	12246	39.5	0.0622287
Guangdong	2015	0.273146	10118.1	2696.79	1771.26	53.52	91.56	9769	2.6	3913.77	2040.65	0.02898	0.328875	99.9	0.384383	0.432478	5.51365	13360	40.6	0.0722627
Guangdong	2016	0.293962	9923.08	2390.5	1771.71	53.52	96.22	10634	2.5	3971.72	2318.47	0.0287395	0.330563	99.9	0.385097	0.433894	5.55177	14512	40.4	0.0829165
Guangdong	2017	0.297455	10054.7	2410.77	1774.61	53.52	97.98	10582	2.41	4071.26	2575.52	0.0251014	0.330757	99.93	0.385113	0.437115	5.56938	15780	40.2	0.0913733
Guangdong	2018	0.31069	10026	2429.94	1775.21	53.52	99.87	10812	2.31	3524.39	2792.9	0.0267158	0.337556	99.98	0.387181	0.498351	5.68589	17168	36.6	0.137496
Guangdong	2019	0.348355	10472.5	2455.79	1773.4	53.52	99.95	11497	2.18	3584.08	3210.51	0.0298998	0.343703	99.98	0.39108	0.49236	5.79464	18818	37.1061	0.117307
Guangdong	2020	0.374912	10472.5	2495.43	1776.46	53.52	99.95	12288	2.13	3949.1	3510.56	0.0298998	0.358237	99.98	0.4008	0.511235	6.06521	20143	40.8	0.122791
Guangdong	2021	0.394486	10472.5	2799.34	1776.46	53.52	99.95	12288	2.13	3949.1	3510.56	0.0298998	0.36048	99.98	0.406646	0.546455	6.15085	22306	39.3	0.124518
Guangxi	2010	0.355683	6554.2	2767.67	1523.05	56.51	91.1	1487	3.64	604.35	366.84	0.0707973	0.407086	96.5	0.313851	0.371476	5.1898	5214	48.5	0.0296927
Guangxi	2011	0.43102	6653.12	3033.15	1529.24	56.51	95.49	2104	3.74	636.6	456.89	0.0407181	0.416335	96.99	0.327032	0.404843	5.30772	6003	43.8	0.0223808
Guangxi	2012	0.453004	6969.8	3195.91	1541.29	56.51	98	2159	3.74	664.97	589.24	0.0374963	0.425171	97.74	0.333349	0.427855	5.40698	6894	42.8	0.0341155
Guangxi	2013	0.484168	7175.98	3382.98	1586.37	56.51	96.44	2156	3.71	684.16	609.93	0.034166	0.433987	98	0.34347	0.41707	5.51168	7793	40	0.0313611
Guangxi	2014	0.505954	6993.64	3567.49	1600	60.17	95.4	2129	3.68	644.58	660.53	0.0359625	0.441562	98.2	0.35198	0.443669	5.60423	8683	36.9	0.0354896
Guangxi	2015	0.533257	6823.25	3803.18	1618.79	60.17	98.65	1496	3.61	676.03	789.69	0.0465707	0.450404	98.31	0.358381	0.464555	5.70418	9467	35.4	0.0381744
Guangxi	2016	0.576549	6619.72	3527.26	1646.07	60.17	98.96	1503	3.5	684.66	854.55	0.0378857	0.457125	98.4	0.365732	0.483611	5.79052	10359	34.5	0.0368499
Guangxi	2017	0.58657	6536.31	3658.33	1669.87	60.17	99.92	1552	3.41	701.37	920.2	0.0330286	0.464829	98.55	0.371287	0.514306	5.88068	11325	32.2	0.0466437
Guangxi	2018	0.610693	6611.42	3750.82	1706.88	60.17	100	1645	3.26	714.49	933.22	0.0317772	0.472842	98.78	0.38337	0.526663	5.96989	12435	30.1	0.0552432
Guangxi	2019	0.680383	6500.4	3840.04	1713.08	60.17	100	1784	3.13	661.91	1014.52	0.0273374	0.481102	98.92	0.393611	0.557871	6.07418	13676	30.9142	0.0651558
Guangxi	2020	0.726464	6500.4	3901.4	1731.03	60.17	100	1934	3.01	708.04	1061.1	0.0273374	0.490305	99.15	0.413146	0.594586	6.19037	14815	34.57	0.0664022
Guangxi	2021	0.797203	6500.4	4001.23	1731.03	60.17	100	1934	3.01	708.04	1061.1	0.0273374	0.498095	99.15	0.424681	0.628025	6.28873	16362.9	33.3	0.0674572
Hainan	2010	0.600887	7493.52	425.24	243.79	55.38	68	394	0.27	173	98.33	0.0476826	0.465586	95.41	0.365487	0.362325	5.88748	5566	50.0392	0.0145639
Hainan	2011	0.715281	7929.63	444.33	247.51	55.38	91.35	389	0.28	174.3	127.27	0.0483092	0.46157	95.42	0.378801	0.378564	5.80809	6801	51.81	0.0156798
Hainan	2012	0.751538	8278.07	479.66	256.75	55.38	99.91	459	0.29	151.7	158.79	0.0444444	0.453199	95.45	0.382275	0.37959	5.76146	7816	50.9	0.0179261
Hainan	2013	0.786522	8040.75	502.1	260.93	55.38	99.9	457	0.34	152.2	174.57	0.0476349	0.462394	95.45	0.392754	0.402703	5.85395	8802	49.5	0.0247369
Hainan	2014	0.847436	8163.59	517.31	259.92	57.36	99.83	484	0.36	153.4	175.95	0.0442419	0.466702	95.47	0.404827	0.401336	5.85894	9913	43.2	0.0245934
Hainan	2015	0.884021	8626.78	511.59	263.99	57.36	99.84	457	0.34	168.35	206.84	0.0530659	0.467027	95.48	0.411975	0.445035	6.01033	10858	42.7	0.0350622
Hainan	2016	0.966249	8686.51	516.57	289.95	57.36	99.94	715	0.33	156.19	214.24	0.0462933	0.480236	95.78	0.41623	0.469156	6.1586	11843	43.2	0.0424731
Hainan	2017	0.990535	8552.35	569.8	289.25	57.36	99.98	697	0.3	161.68	220.87	0.0422788	0.487924	99.07	0.418665	0.471186	6.28172	12902	41.9	0.0399412
Hainan	2018	1.00407	8620.01	565.82	290.48	57.36	100	986	0.34	196.8	248.98	0.0397479	0.493347	99.08	0.419473	0.476949	6.37365	13989	41.8	0.0390691
Hainan	2019	1.08443	9219.2	581.23	290.63	57.36	100	1048	0.32	201.62	273.5	0.038364	0.489772	99.08	0.419607	0.4905	6.3423	15113	41.7127	0.112351
Hainan	2020	1.12289	9219.2	615.57	292.21	57.36	100	1296	0.33	198.96	295.84	0.038364	0.492623	99.23	0.438823	0.558956	6.39415	16279	43.8	0.113005
Hainan	2021	1.22984	9219.2	701.34	292.21	57.36	100	1296	0.33	198.96	295.84	0.038364	0.49735	99.23	0.449512	0.561851	6.46555	18076.3	41.6	0.114089
Chongqing	2010	0.22516	8785.89	1071.09	685.25	38.43	98.8	1642	2.46	412.3	240.46	0.0502063	0.627218	97.39	0.335454	0.340069	6.34966	5378	42.9	0.0181893
Chongqing	2011	0.269735	8732.68	1140.3	692.88	38.43	99.55	1835	2.42	429.27	318.7	0.0498137	0.635285	98.56	0.356699	0.376129	6.46979	6605	41.5	0.0220086
Chongqing	2012	0.295697	8713.13	1162	702.97	38.43	99.28	1992	2.33	447.83	471.49	0.0526854	0.641105	98.76	0.35833	0.378821	6.56377	7526	38.9	0.0265977
Chongqing	2013	0.312587	8750.88	1198.88	675.18	38.43	99.43	2093	2.34	491.22	437.28	0.0480978	0.659293	98.88	0.368332	0.407089	6.62319	8493	43.8	0.0302017
Chongqing	2014	0.3256	8748.09	1243.34	677.26	43.11	99.2	2843	2.28	506.89	469.98	0.051195	0.673409	98.95	0.377381	0.436731	6.73817	9490	40.5	0.0345193
Chongqing	2015	0.347785	8877.95	1299.73	687.19	43.11	98.6	3208	2.23	529.92	536.24	0.0558891	0.694075	99.07	0.38566	0.45274	6.9492	10505	40	0.0400298
Chongqing	2016	0.397749	8932	1318.66	690.6	43.11	99.98	3530	2.16	566.12	575.18	0.040211	0.718144	99.19	0.390037	0.473301	7.07096	11549	38.7	0.0455789
Chongqing	2017	0.405884	8981.9	1352.6	694.26	43.11	99.42	4115	2.01	599.87	626.3	0.0301643	0.742457	99.22	0.39257	0.480513	7.35187	12638	36.5	0.0519902
Chongqing	2018	0.435884	9033.41	1428.12	696.94	43.11	99.97	4242	1.79	616.99	680.99	0.0382703	0.773579	99.27	0.394996	0.49586	7.60418	13781	34.9	0.0582788
Chongqing	2019	0.486697	9079.9	1464.67	697.68	43.11	88.82	4606	1.6	627.76	728.26	0.0314836	0.803943	99.4	0.398877	0.508513	7.90214	15133	34.8883	0.0664784
Chongqing	2020	0.562041	9079.9	1497.99	698.32	43.11	93.84	4801	1.49	711.01	754.97	0.0314836	0.829592	99.51	0.408964	0.534311	8.14082	16361	36.66	0.0686837
Chongqing	2021	0.59839	9079.9	1677.23	698.32	43.11	93.84	4801	1.49	711.01	754.97	0.0314836	0.852809	99.51	0.416059	0.539227	8.34977	18099.6	36.6	0.0706059
Sichuan	2010	0.296448	9048.94	3155.13	2553.11	35.22	86.9	4638	7.4	804.48	540.65	0.070716	0.886031	97.33	0.351471	0.381615	9.84276	5400	48.3	0.0344646
Sichuan	2011	0.353993	9190.94	3426.1	2600.75	35.22	88.43	4710	7.56	812.64	684.66	0.0721077	0.930005	97.69	0.365717	0.404566	9.94046	6505	46.24	0.0385565
Sichuan	2012	0.388695	9173.37	3694.03	2662.65	35.22	88.29	5147	7.44	822.77	993.2	0.0684866	0.955209	97.75	0.368285	0.422625	10.1752	7432	46.85	0.0429637
Sichuan	2013	0.401702	9274.76	3953.09	2616.54	35.22	94.98	5404	7.39	871.35	1036.41	0.0666834	0.974415	97.89	0.377047	0.45751	10.4168	8381	40.03	0.0584559
Sichuan	2014	0.433063	9320.7	4160.12	2666.32	38.03	95.37	4280	7.3	950.54	1056.91	0.0718474	0.998955	98.07	0.385739	0.467399	10.6391	9348	39.7	0.0303936
Sichuan	2015	0.446681	9488.03	4404.55	2735.09	38.03	96.79	4383	7.04	969.96	1252.33	0.0813843	1.01845	98.24	0.391032	0.479898	10.9062	10247	39.1	0.0340866
Sichuan	2016	0.472743	9624.55	4267.32	2813.55	38.03	98.6	4974	6.54	1056.64	1301.85	0.0822155	1.04375	98.29	0.395377	0.49332	11.1368	11203	38.1	0.0433717
Sichuan	2017	0.514236	9668.77	4420.3	2873.1	38.03	98.54	5893	6.48	1213.03	1389.2	0.0704947	1.06756	98.54	0.397924	0.518257	11.4294	12227	37.2	0.088855
Sichuan	2018	0.532075	9735.06	4603.88	2932.54	38.03	99.3	6116	6.29	1101.81	1461.78	0.0749138	1.10021	98.79	0.401343	0.541773	11.7656	13331	35.8	0.105129
Sichuan	2019	0.575682	9774.5	4682.3	2954.09	38.03	99.82	6627	6.05	1390.62	1578.88	0.0680447	1.08989	98.95	0.405764	0.554106	12.0824	14670	34.7094	0.0572898
Sichuan	2020	0.663847	9774.5	4754	2992.24	38.03	99.99	7527	5.71	1669.27	1686.16	0.0680447	1.02374	99.33	0.416412	0.594955	12.304	15929	36.6	0.0589647
Sichuan	2021	0.676285	9774.5	4896.4	2992.24	38.03	99.99	7527	5.71	1669.27	1686.16	0.0680447	1.00926	99.33	0.424075	0.609696	12.4872	17575.3	36.3	0.060479
Guizhou	2010	0.173268	6181.24	1730.31	1131.72	37.09	90.6	1197	3.15	241.13	292.06	0.112923	0.584084	92.55	0.267747	0.31506	7.6743	3768	46.3	0.0190598
Guizhou	2011	0.198187	5799.8	1851.4	1201.19	37.09	88.56	1203	3.46	244.94	376.86	0.122403	0.612181	92.81	0.274112	0.338126	7.66665	4499	47.7	0.0247881
Guizhou	2012	0.240507	6983.13	2106.65	1214.57	37.09	91.92	1262	3.67	250.35	500.51	0.119636	0.624967	92.99	0.277246	0.344378	7.92107	5159	44.6	0.0303555
Guizhou	2013	0.275138	6594.48	2240.8	926.9	37.09	92.23	1280	3.63	240.67	560.67	0.104352	0.636127	94.1	0.286798	0.384297	7.47349	5898	43	0.0441255
Guizhou	2014	0.348518	7188.75	2458.4	981.83	43.77	93.26	1375	3.63	246.18	637.03	0.111116	0.652595	95.39	0.295858	0.391347	7.62135	6671	37.2	0.0571908
Guizhou	2015	0.442826	7396.29	2575.15	1065.43	43.77	93.81	1440	3.6	257.63	772.91	0.130051	0.668545	95.97	0.300529	0.39287	7.85422	7387	34.2	0.0703155
Guizhou	2016	0.495423	7227.06	2041.06	1088.07	43.77	94.65	1361	3.47	289.97	843.54	0.118613	0.689686	96.13	0.302509	0.392303	7.14565	8090	30.8	0.0857292
Guizhou	2017	0.534394	7333.08	2181.43	1114.12	43.77	95.22	2109	3.51	312.95	901.96	0.101086	0.706703	96.47	0.304986	0.407853	6.76301	8869	30.2	0.0961851
Guizhou	2018	0.564103	7082.83	2376.65	1132.24	43.77	96.09	2240	3.41	361.74	985.95	0.0992629	0.721775	96.76	0.307546	0.44112	6.89367	9716	28.3	0.0918448
Guizhou	2019	0.592661	7171	2484.6	1153.99	43.77	96.59	2275	3.2	423.84	1067.62	0.101867	0.746632	97	0.312638	0.477619	7.1305	10756	27.0723	0.087416
Guizhou	2020	0.658378	7171	2582.36	1165.49	43.77	97.85	2445	3.13	432.74	1073.34	0.101867	0.757437	97.51	0.322529	0.525477	7.36524	11642	36.75	0.0903005
Guizhou	2021	0.708962	7171	2778.9	1165.49	43.77	97.85	2445	3.13	432.74	1073.34	0.101867	0.778759	97.51	0.327868	0.495678	7.56703	12856.1	31.91	0.0927746
Yunnan	2010	0.236939	5599.65	2411.05	1588.42	50.03	88.3	1654	3.62	299.26	374.79	0.0862806	0.430971	96.39	0.278658	0.346164	4.19956	4327	47.2144	0.025216
Yunnan	2011	0.302294	6538.2	2628.39	1634.24	50.03	74.13	1739	3.57	323.6	483	0.0871437	0.435425	96.72	0.287926	0.368329	4.21229	5170	47.1003	0.0305855
Yunnan	2012	0.354222	6624.02	2874.45	1677.9	50.03	82.7	2409	3.53	353.1	674.82	0.0833973	0.448508	97.04	0.2911	0.370547	4.31381	5930	45.6142	0.0449034
Yunnan	2013	0.404762	6842.06	3070.33	1660.27	50.03	87.62	2534	3.59	350.07	685.97	0.0845025	0.462468	97.28	0.299377	0.353048	4.3579	6724	44.2202	0.0590831
Yunnan	2014	0.431421	7159.42	3215.03	1708.97	55.04	92.47	2374	3.57	356.95	674.94	0.0823421	0.473405	97.48	0.306844	0.370666	4.39956	7456	35.6	0.0711387
Yunnan	2015	0.445915	7238.98	3333.04	1757.71	55.04	90.03	2619	3.57	381.42	767.46	0.0952653	0.489258	97.68	0.312517	0.386421	4.51831	8242	36.4	0.082336
Yunnan	2016	0.475839	7315.71	3440.64	1809.39	55.04	92.96	3240	3.6	394.76	871.14	0.0883254	0.50286	98.24	0.315263	0.393674	4.62345	9020	35.3	0.0854939
Yunnan	2017	0.498274	7475.02	3534.53	1851.42	55.04	92.74	5091	3.73	415.19	998.33	0.0839365	0.516542	98.66	0.31817	0.410378	4.72306	9862	32.5	0.0829799
Yunnan	2018	0.531299	7531.97	2693.51	1898.07	55.04	98.16	6158	3.84	424.86	1077.43	0.0813803	0.526316	98.9	0.321548	0.421853	4.79995	10768	29.5	0.083899
Yunnan	2019	0.644398	7591.4	2714.4	1922.49	55.04	99.77	4610	3.75	443.99	1069.85	0.0730623	0.53767	99.14	0.32844	0.437433	4.944	11902	31.8204	0.0908336
Yunnan	2020	0.764844	7591.4	2786.75	1978.07	55.04	99.99	5155	3.65	460.78	1162.02	0.0730623	0.549868	99.38	0.342453	0.450527	5.062	12842	34.3	0.0931807
Yunnan	2021	0.825196	7591.4	2994.3	1978.07	55.04	99.99	5155	3.65	460.78	1162.02	0.0730623	0.56539	99.38	0.347081	0.451384	5.20307	14197.3	35.78	0.0957374
Tibet	2010	0.215842	5359.98	378.06	237.03	11.98	88.23	187	0.43	31.2	60.8	0.263911	1.02516	91.41	0.270219	0.282615	22.6611	4123	49.7094	0.0180048
Tibet	2011	0.22589	5508.67	427.9	245.31	11.98	89.32	165	0.91	57.5	77.81	0.295386	0.99782	92.8	0.296193	0.270531	22.0485	4886	50.5052	0.0206272
Tibet	2012	0.239048	5553.67	464.95	251.04	11.98	89.43	43	1.02	59.81	94.48	0.348	0.971353	94.51	0.310315	0.272327	21.6455	5698	53.65	0.021485
Tibet	2013	0.256151	5465.97	517.3	239.27	11.98	90.01	285	1.04	34	107.18	0.411943	2.20204	95.51	0.32132	0.299876	21.7923	6553	54.2493	0.0245501
Tibet	2014	0.271077	5553.85	570.82	244.03	12.14	90.03	303	1.11	64.5	142.08	0.399291	2.8488	95.91	0.334257	0.307741	21.9187	7359	52.6	0.0264442
Tibet	2015	0.283636	5625.24	619.69	247.79	12.14	90.12	317	1.14	56.5	167.27	0.37334	2.91399	95.96	0.32384	0.327811	22.3959	8244	52.2	0.0120564
Tibet	2016	0.325	5511.87	635.14	251.53	12.14	91.15	317	1.09	81.4	169.64	0.411043	2.93991	96.32	0.327099	0.312243	22.6038	9094	52.4	0.0100576
Tibet	2017	0.338682	5738.33	523.09	261.23	12.14	95.42	360	1.27	67.48	227.2	0.349483	2.94194	97.26	0.3368	0.317289	22.6194	10330	49.1	0.00911828
Tibet	2018	0.362429	5652.78	545.78	264.53	12.14	95.97	436	1.27	68.21	232.15	0.352368	2.91871	98.21	0.338787	0.323592	22.4707	11450	36.1	0.0132281
Tibet	2019	0.382798	5624.2	559.02	275.94	12.14	98.34	670	1.24	66.97	263.26	0.330868	2.89316	98.61	0.346191	0.328354	22.2655	12951	35.6874	0.0262668
Tibet	2020	0.411182	5624.2	576.78	282.82	12.14	99.63	778	1.26	68.45	273.89	0.330868	2.93241	99.23	0.354699	0.357725	22.4081	14598	37.78	0.02643
Tibet	2021	0.448415	5624.2	600.4	282.82	12.14	99.63	778	1.26	68.45	273.89	0.330868	2.9697	99.23	0.36411	0.3756	22.693	16932.3	37.79	0.0267661
Shaanxi	2010	0.253467	7314.32	2000	1284.87	41.42	79.8	2466	3.88	371.09	377.79	0.0481951	0.761158	97.7	0.291794	0.369956	13.4822	4477	34.2459	0.0415626
Shaanxi	2011	0.315378	7549.04	2182.85	1274.34	41.42	90.27	2816	3.88	375.9	529.46	0.0518917	0.751663	97.87	0.307468	0.37572	13.6712	5484	30	0.0436923
Shaanxi	2012	0.347188	7875.24	2350.17	1277.18	41.42	88.49	2872	3.71	380.48	703.34	0.0461876	0.787091	98.12	0.310079	0.384569	14.1193	6285	29.7204	0.0501607
Shaanxi	2013	0.384727	7645.42	2452.72	1209.94	41.42	96.44	3285	3.47	370.84	710.11	0.0429162	0.815294	98.26	0.317372	0.395634	14.5206	7092	31.817	0.053119
Shaanxi	2014	0.409433	7723.88	2552.13	1226.49	43.06	95.78	3794	3.34	379.42	693.83	0.056882	0.834673	98.49	0.325536	0.413314	14.7961	7932	29.1	0.05325
Shaanxi	2015	0.415939	7986.44	2667.27	1236.77	43.06	98.02	4266	3.32	404.99	758.07	0.0487139	0.75889	98.71	0.32888	0.427914	13.0654	8689	27.8	0.022129
Shaanxi	2016	0.437816	7990.63	2171.91	1251.39	43.06	98.53	4427	3.27	445.18	777.53	0.0521915	0.768297	98.87	0.33038	0.442356	12.0021	9396	26.9	0.0229779
Shaanxi	2017	0.445978	7928.93	2242.51	1263.09	43.06	98.96	5350	3.19	447.67	828.25	0.0549792	0.755674	98.99	0.333171	0.456445	11.0669	10265	26	0.0229512
Shaanxi	2018	0.465581	8105.61	2311.79	1274.99	43.06	99.06	6323	2.94	483.89	871.44	0.0495779	0.759696	99.34	0.336535	0.458481	10.7316	11213	25.6	0.0238627
Shaanxi	2019	0.504845	8085.7	2331.49	1285.16	43.06	99.71	6129	2.72	566.67	951.23	0.0397361	0.780554	99.38	0.341459	0.465042	10.5722	12326	25.9	0.0259443
Shaanxi	2020	0.573428	8085.7	2387.96	1336.81	43.06	99.93	6286	2.52	577.78	998.58	0.0397361	0.790964	99.62	0.351643	0.497507	10.4857	13316	27.98	0.0268305
Shaanxi	2021	0.609355	8085.7	2543.2	1336.81	43.06	99.93	6286	2.52	577.78	998.58	0.0397361	0.803855	99.62	0.362164	0.530913	10.4174	14744.8	28.99	0.0275508
Gansu	2010	0.184611	6763.7	1977.55	1278.45	11.28	38	1173	2.04	398.22	228.23	0.0931097	0.7497	93.72	0.271129	0.337233	9.87574	3747	42.07	0.0195191
Gansu	2011	0.205956	7085.77	2136.48	1291.82	11.28	41.7	1286	2.1	373.81	284.33	0.0976333	0.766214	94.05	0.272363	0.371565	9.82652	4278	39.66	0.0267769
Gansu	2012	0.231725	7636.25	2279.08	1297.58	11.28	41.68	1334	2.14	370.44	367.92	0.0868669	0.785979	97.56	0.274264	0.366073	10.2831	4931	37.13	0.0302157
Gansu	2013	0.259401	7585.09	2418.46	1284.08	11.28	42.29	1367	2.2	372.12	377.06	0.0739172	0.813504	98.04	0.281236	0.392339	10.614	5589	34.47	0.0375086
Gansu	2014	0.274911	8004.47	2545.71	1297.06	11.33	62.6	1430	2.17	380.79	401.26	0.0864605	0.840583	98.35	0.287883	0.385648	10.9228	6277	34.9	0.0482925
Gansu	2015	0.290686	8142.78	2684.95	1306.72	11.33	64.24	1518	2.14	392.05	498.33	0.113125	0.873601	98.47	0.291833	0.391382	11.3959	6936	32.9	0.0579036
Gansu	2016	0.317778	7959.94	1903.9	1317.51	11.33	72.76	1664	2.11	342.16	548.95	0.0870304	0.904315	98.55	0.290235	0.383182	11.7929	7457	31.3	0.0682761
Gansu	2017	0.34092	7992.6	2018.59	1331.43	11.33	98.4	1694	2.14	360.96	567.35	0.0916857	0.939308	98.68	0.290891	0.388693	12.2584	8076	30.4	0.134392
Gansu	2018	0.368231	8323.81	2102.8	1337.54	11.33	99.76	1999	1.93	355	592.96	0.103526	0.974472	98.81	0.293888	0.401	12.6942	8804	29.7	0.0775231
Gansu	2019	0.422212	8628.8	2174.01	1328.86	11.33	100	1964	1.82	375.39	636.05	0.104845	0.995198	98.9	0.297899	0.396418	12.9772	9629	29.1627	0.085857
Gansu	2020	0.475139	8628.8	2289.53	1338.6	11.33	100	2115	1.81	373.8	662.99	0.104845	1.02701	99.41	0.305836	0.403128	13.4281	10344	30.89	0.0888904
Gansu	2021	0.54808	8628.8	2634.3	1338.6	11.33	100	2115	1.81	373.8	662.99	0.104845	1.05759	99.41	0.315934	0.435077	13.7968	11432.8	30.9	0.0913879
Qinghai	2010	0.235328	3731.03	421.31	251.67	5.63	67.3	553	0.59	84.59	82.47	0.443092	1.13326	95.03	0.278523	0.405851	13.3552	4028	39.6	0.0186844
Qinghai	2011	0.268662	3708.61	430.69	251.67	5.63	89.46	592	0.64	84.59	130.11	0.106068	1.17876	95.69	0.295082	0.428049	13.7302	4806	37.8325	0.0209081
Qinghai	2012	0.305079	3632.99	434.99	251.67	5.63	89.21	592	0.66	84.59	171.81	0.122465	1.20223	96.33	0.305083	0.447006	14.0036	5594	34.8128	0.017026
Qinghai	2013	0.358494	3663.03	410.58	186.9	5.63	77.83	651	0.67	94.97	121.51	0.135305	1.2364	96.93	0.317512	0.462676	14.4017	6462	30.9	0.0113279
Qinghai	2014	0.374826	3749.96	440.9	182.49	5.82	86.27	669	0.69	94.97	156.31	0.131131	1.2643	97.51	0.326489	0.47076	14.6807	7283	31.9	0.0156802
Qinghai	2015	0.362045	3710.57	453.87	196.99	5.82	87.18	691	0.7	98.45	163.19	0.166298	1.28738	98	0.323242	0.446123	14.8569	7933	29.9	0.00781754
Qinghai	2016	0.380069	3680.34	458.56	202.35	5.82	96.28	698	0.65	97.43	171.36	0.134366	1.32796	98.21	0.323803	0.442239	15.3362	8664	29.4	0.0101354
Qinghai	2017	0.406826	3629.21	462.35	206.61	5.82	94.78	698	0.71	101.31	187.51	0.0962025	1.37899	98.43	0.324385	0.461184	15.8852	9462	29.7	0.0130238
Qinghai	2018	0.456729	3664.23	472.09	214.04	5.82	96.01	712	0.68	102.81	199.1	0.102313	1.43922	98.65	0.329779	0.450126	16.5211	10393	29.5	0.0225252
Qinghai	2019	0.511695	3766.6	484.24	213.33	5.82	96.28	751	0.69	136.01	221.37	0.106065	1.48438	98.82	0.339905	0.476617	17.0395	11499	29.7331	0.0571957
Qinghai	2020	0.570168	3766.6	491.41	219.25	5.82	99.29	741	0.67	140.8	218.14	0.106065	1.52552	99.11	0.347603	0.499034	17.5118	12342	30.2	0.0587813
Qinghai	2021	0.593687	3766.6	524.23	219.25	5.82	99.29	741	0.67	140.8	218.14	0.106065	1.55913	99.11	0.360421	0.542588	17.8976	13604.2	31.94	0.060076
Ningxia	2010	0.239194	7939.37	729.12	464.6	11.89	92.5	936	0.4	136.36	81.59	0.0840256	0.600418	98.2	0.339561	0.356422	7.03521	5125	38.4178	0.047427
Ningxia	2011	0.270062	7834.97	768.73	477.59	11.89	66.95	764	0.39	131.8	103.02	0.0837963	0.613573	98.6	0.343011	0.368959	7.10877	5931	37.3	0.051224
Ningxia	2012	0.286798	8458.36	787.28	491.35	11.89	70.64	604	0.37	144.3	106.45	0.074894	0.61506	98.9	0.347362	0.382967	6.93029	6776	35.3438	0.052746
Ningxia	2013	0.316366	8374.28	801.98	498.56	11.89	92.5	671	0.37	145.13	112.95	0.0787274	0.633576	99.09	0.353837	0.426393	7.22404	7599	34.4	0.0688019
Ningxia	2014	0.319912	8610.83	813.02	498.91	12.63	93.25	687	0.39	146.8	122.68	0.0805568	0.649647	99.11	0.361177	0.445864	7.42361	8410	29.9	0.0682293
Ningxia	2015	0.346199	8544.87	831.26	506.53	12.63	89.92	746	0.36	161.42	142.51	0.0917222	0.676273	99.24	0.362066	0.443268	7.72106	9119	29.1	0.076395
Ningxia	2016	0.346763	8659.41	580.54	515.15	12.63	98.28	747	0.36	160.78	152.57	0.0681074	0.697447	99.34	0.362833	0.448733	7.93346	9852	26.5	0.0896569
Ningxia	2017	0.355461	8527.72	605.38	511.45	12.63	99.08	759	0.32	235.59	170.65	0.0718485	0.72648	99.37	0.364346	0.493694	8.20923	10738	25.3	0.0948057
Ningxia	2018	0.393521	8922.51	621.88	523.45	12.63	99.3	786	0.31	235.56	170.47	0.0923009	0.744214	99.79	0.367079	0.490968	8.39845	11708	27.3	0.0947012
Ningxia	2019	0.39046	9068.9	632.15	538.29	12.63	99.89	869	0.31	251.71	179.33	0.0838002	0.766959	99.88	0.374563	0.474525	8.64747	12858	27.4292	0.0924186
Ningxia	2020	0.46895	9068.9	644.09	552.53	12.63	99.96	898	0.31	277.22	208.42	0.0838002	0.791734	99.94	0.38883	0.523884	8.92285	13889	28.41	0.095404
Ningxia	2021	0.502731	9068.9	697.45	552.53	12.63	99.96	898	0.31	277.22	208.42	0.0838002	0.816376	99.94	0.400531	0.533204	9.15479	15336.6	29.12	0.0978839
Xinjiang	2010	0.457803	13759.9	1643.67	3721.6	4.24	70.6	2035	0.87	373.11	313.84	0.03347	0.784594	95.28	0.34482	0.355064	7.06616	4993	40.3247	0.0188881
Xinjiang	2011	0.470652	14071.6	1796.68	3884.57	4.24	79.48	2128	1.09	385.14	399.8	0.0358112	0.813093	95.29	0.355503	0.388923	7.03589	5853	36.142	0.014313
Xinjiang	2012	0.534443	14073.6	1968.93	4029.07	4.24	78.74	2162	1.29	425.79	473.86	0.034229	0.81482	95.62	0.361533	0.399584	6.84401	6876	36.1	0.0184926
Xinjiang	2013	0.580569	15173.2	2165.86	4769.89	4.24	78.09	2235	1.43	493.29	532.67	0.0404191	0.811528	95.95	0.372054	0.421343	6.88408	7847	33.8615	0.0190761
Xinjiang	2014	0.605032	15094.4	2341.76	4831.89	4.87	81.87	2431	1.53	524.7	567.2	0.0324866	0.825297	96.94	0.375808	0.416455	7.09222	8724	34.5	0.0148731
Xinjiang	2015	0.591069	15678.2	2489.32	4944.92	4.87	80.88	2493	1.46	574.26	647.93	0.0445977	0.835789	97.04	0.358706	0.396498	7.15783	9425	34.1	0.0168549
Xinjiang	2016	0.606755	12930.4	2552.15	4982.03	4.87	83.3	2441	1.55	590.8	664.52	0.0378264	0.847317	97.25	0.357763	0.389891	7.22878	10183	31.7	0.0187323
Xinjiang	2017	0.625726	12898.9	2638.84	4952.29	4.87	88.57	2288	1.59	738.87	722.59	0.0318876	0.854235	97.47	0.358895	0.382199	7.4777	11045	30.6	0.0205553
Xinjiang	2018	0.671468	13401.4	2731.79	4883.46	4.87	91.45	2292	1.56	585.44	812.88	0.0367904	0.88097	98.07	0.365493	0.389442	7.86143	11975	30	0.0224341
Xinjiang	2019	0.696272	13772.1	2788.97	4959.89	4.87	96.26	2293	1.42	605.06	863.07	0.0370793	0.886254	98.52	0.378548	0.403141	8.04392	13122	28.9655	0.0268863
Xinjiang	2020	0.764836	13772.1	2929.44	4893.35	4.87	99.07	2375	1.47	753.7	908.11	0.0370793	0.837411	98.85	0.403467	0.469589	8.15921	14056	32.2	0.0271826
Xinjiang	2021	0.910027	13772.1	2396.43	4893.35	4.87	99.07	2375	1.47	753.7	908.11	0.0370793	0.852206	98.85	0.41377	0.498422	8.32053	15575.3	30.5	0.0276628
