# Supplementary material for: How Does China's Local Fiscal Decentralization Promote Common Prosperity? An Analysis of the Mediating Role of Rural Revitalization
Source: Research Square preprint supplement (doi:10.21203/rs.3.rs-6733019/v1), 2025-05-30
Supplement: Supplementary file 3 [file 90fa45109683c8723eb443e2.docx]

Supplementary Materials

Data Sources and File Descriptions

1.The data in Table ***data1*** constitute the indicator system for measuring the Common Prosperity Index and Rural Revitalization Index using the TOPSIS-entropy weight method. The data in Table ***data2*** include dependent variables, independent variables, and control variables employed for panel data analysis. All data used in this study originate from officially published statistical yearbooks of the National Bureau of Statistics of China (e.g., ***China Statistical Yearbook, China Rural Statistical Yearbook, China Urban Statistical Yearbook, China Regional Economic Statistical Yearbook, and China Urban Economic Statistical Yearbook.***) or were derived from calculations based on these yearbooks. Detailed computational methodologies are provided in the main text. While these statistical yearbooks are not publicly available as online datasets, they can be accessed through official Chinese platforms, including the National Bureau of Statistics website (www.stats.gov.cn).
